# Supplementary material
Source: PubMed Central journal article supplement (PMC3293562)
Supplement: supp_M111.282210_jbc.M111.282210-1.pdf [file supp_M111.282210_jbc.M111.282210-1.pdf]

## **SUPPLEMENTARY FIGURE LEGEND**

### **Supplementary Figure 1.- Angiotensin II-mediated stimulation of ERK5 in cardiac fibroblasts does not involve transmodulation of Gi-coupled pathways.**

Primary mouse cardiac fibroblasts were pre-treated or not with pertussis toxin (PTX) as detailed in Experimental Procedures, and challenged for 30 min with angiotensin II. Cell lysates were analysed for ERK5 stimulation as in Figure 2A. Inhibition of Gi protein coupling by PTX does not affect angiotensin II-mediated activation of ERK5. Blots are representative of 3 independent experiments.

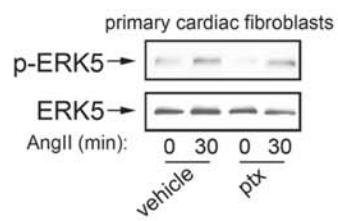

García-Hoz et al.

Supplementary Figure 1
