# Supplementary material
Source: PubMed Central journal article supplement (PMC3293562)
Supplement: supp_M111.282210_jbc.M111.282210-2.pdf [file supp_M111.282210_jbc.M111.282210-2.pdf]

**Supplementary Table 1. Oligonucleotides used**

| <b>Used for</b> | <b>Name</b>      | <b>Sequence</b>          |
|-----------------|------------------|--------------------------|
| qRT-PCR         | <i>qNppa-F</i>   | CACAGATCTGATGGATTTC AAGA |
|                 | <i>qNppa-R</i>   | CCTCATCTTCTACCGGCATC     |
|                 | <i>qColla2-F</i> | GCAGGTTACCTACTCTGTCCT    |
|                 | <i>qColla2-R</i> | CTTGCCCCATTTCATTTGTCT    |
|                 | <i>qMapk7-F</i>  | CAGCAGCTGTCCAAGTCTCA     |
|                 | <i>qMapk7-R</i>  | CTTTGGAGTGCCAGAGAACA     |
|                 | <i>qHprt-F</i>   | TCCTCCTCAGACCGCTTTT      |
|                 | <i>qHprt-R</i>   | CCTGGTTCATCATCGCTAATC    |
|                 | <i>qGAPDH-F</i>  | CTCCCACTCTTCCACCTTCG     |
|                 | <i>qGAPDH-R</i>  | CATACCAGGAAATGAGCTTGACAA |
|                 | <i>q18S-F</i>    | CTCAACACGGGAAACCTCAC     |
|                 | <i>q18S-R</i>    | CGCTCCACCAACTAAGAACG     |
