# Supplementary material
Source: PubMed Central journal article supplement (PMC3293562)
Supplement: supp_M111.282210_Suppl_Table3_GarciaHozetal_JBC2011-282210.pdf [file supp_M111.282210_Suppl_Table3_GarciaHozetal_JBC2011-282210.pdf]

Table 3 Genes Down

| Probeset     | Fold change | p-val   | Gene Symbol            |
|--------------|-------------|---------|------------------------|
| 1426672_at   | -2,87       | 8,1E-10 | Tmem16k                |
| 1423893_x_at | -2,70       | 4,6E-07 | Apbb1                  |
| 1421097_at   | -2,68       | 5,7E-08 | Endog                  |
| 1433817_at   | -2,66       | 2,1E-07 | Agpat3                 |
| 1427964_at   | -2,63       | 3,5E-08 | Cmtm8                  |
| 1423960_at   | -2,61       | 3,6E-07 | Mboat5                 |
| 1448963_at   | -2,61       | 1,4E-07 | Nfyc                   |
| 1451606_at   | -2,60       | 6,6E-07 | A530016L24Rik          |
| 1439836_at   | -2,56       | 9,1E-07 | Asb15                  |
| 1453065_at   | -2,56       | 2,5E-07 | Aldh5a1                |
| 1449407_at   | -2,54       | 1,2E-07 | Ift81                  |
| 1433819_s_at | -2,54       | 1,4E-07 | ---                    |
| 1424715_at   | -2,52       | 9,7E-07 | Retsat                 |
| 1444153_at   | -2,52       | 1,4E-06 | ---                    |
| 1424937_at   | -2,51       | 1,4E-06 | 2310076L09Rik          |
| 1415948_at   | -2,48       | 8,0E-07 | Creg1                  |
| 1419286_s_at | -2,47       | 7,0E-07 | Ift81                  |
| 1439143_at   | -2,47       | 7,4E-07 | A930018M24Rik          |
| 1427052_at   | -2,46       | 1,4E-06 | Acacb /// LOC100047358 |
| 1429539_at   | -2,45       | 9,8E-07 | Bcl2l13                |
| 1441915_s_at | -2,45       | 2,2E-06 | 2310076L09Rik          |
| 1454935_at   | -2,44       | 2,5E-06 | D930001I22Rik          |
| 1452823_at   | -2,44       | 3,4E-06 | Gstk1                  |
| 1423892_at   | -2,44       | 8,0E-06 | Apbb1                  |
| 1436440_at   | -2,43       | 1,9E-06 | Slc25a12               |
| 1460652_at   | -2,43       | 3,1E-06 | Esrra                  |
| 1449081_at   | -2,43       | 3,2E-06 | Ces3                   |
| 1425628_a_at | -2,42       | 9,5E-07 | Gtf2i                  |
| 1420513_at   | -2,41       | 3,4E-06 | Efcab2                 |
| 1448499_a_at | -2,41       | 2,3E-06 | Ephx2                  |
| 1422500_at   | -2,40       | 5,1E-06 | Idh3a                  |
| 1434072_at   | -2,40       | 2,4E-06 | Smcr7                  |
| 1424393_s_at | -2,40       | 3,4E-06 | Adhfe1                 |
| 1434647_at   | -2,39       | 8,1E-07 | Egflam                 |
| 1416416_x_at | -2,39       | 9,7E-06 | Gstm1                  |
| 1448330_at   | -2,38       | 7,8E-06 | Gstm1                  |
| 1426263_at   | -2,38       | 9,9E-07 | Cadm4                  |
| 1451558_at   | -2,38       | 5,0E-06 | Fbxw7                  |
| 1428146_s_at | -2,38       | 1,5E-05 | Acaa2                  |
| 1428519_at   | -2,38       | 1,4E-05 | 2610528E23Rik          |
| 1419056_at   | -2,37       | 3,0E-06 | Rtn2                   |
| 1418314_a_at | -2,36       | 6,1E-06 | A2bp1                  |
| 1449714_at   | -2,36       | 5,8E-06 | 5730472N09Rik          |
| 1448681_at   | -2,35       | 4,2E-05 | Il15ra                 |
| 1452791_at   | -2,35       | 6,9E-06 | Coq2                   |
| 1435841_s_at | -2,34       | 6,6E-06 | Suclg2                 |
| 1418148_at   | -2,34       | 1,5E-05 | Abhd1                  |
| 1438010_at   | -2,34       | 1,7E-05 | Tmem201                |
| 1429723_at   | -2,34       | 1,5E-05 | 6330409N04Rik          |
| 1449065_at   | -2,34       | 4,6E-06 | Acot1 /// LOC100044830 |
| 1440537_at   | -2,33       | 7,3E-06 | Kcnv2                  |
| 1450725_s_at | -2,33       | 3,9E-05 | Car14                  |
| 1435285_at   | -2,33       | 1,1E-06 | Mpped2                 |
| 1416772_at   | -2,33       | 2,4E-05 | Cpt2                   |
| 1426407_at   | -2,33       | 3,3E-05 | Cugbp1                 |

|              |       |         |                                     |
|--------------|-------|---------|-------------------------------------|
| 1450627_at   | -2,32 | 1,3E-05 | Ank                                 |
| 1427213_at   | -2,32 | 5,3E-06 | Pfkfb1                              |
| 1421590_at   | -2,31 | 2,8E-05 | Mrgprh                              |
| 1455118_at   | -2,31 | 1,7E-05 | D9Ert402e                           |
| 1435370_a_at | -2,31 | 1,7E-05 | Ces3                                |
| 1426502_s_at | -2,31 | 2,6E-05 | Gpt                                 |
| 1449964_a_at | -2,30 | 2,2E-05 | Mlycd                               |
| 1437287_at   | -2,30 | 8,5E-06 | 1110020G09Rik                       |
| 1454982_at   | -2,30 | 1,0E-05 | Arfgef2                             |
| 1419551_s_at | -2,29 | 1,1E-05 | Stk39                               |
| 1460184_at   | -2,29 | 2,0E-05 | Hadh                                |
| 1422997_s_at | -2,29 | 1,9E-05 | Acot1 /// Acot2 ///<br>LOC100044830 |
| 1455214_at   | -2,29 | 3,3E-05 | Mitf                                |
| 1424563_at   | -2,29 | 3,2E-05 | Slc25a4                             |
| 1431302_a_at | -2,29 | 7,0E-05 | Nudt7                               |
| 1436833_x_at | -2,29 | 3,3E-05 | Ttll1                               |
| 1424353_at   | -2,28 | 1,1E-05 | Lrpprc                              |
| 1449443_at   | -2,28 | 2,2E-05 | Decr1                               |
| 1427153_at   | -2,28 | 1,3E-05 | Bckdhb                              |
| 1425115_at   | -2,28 | 1,6E-05 | Rbbp6                               |
| 1425164_a_at | -2,28 | 3,4E-05 | Phkg1                               |
| 1426584_a_at | -2,27 | 8,4E-06 | Sord                                |
| 1418594_a_at | -2,27 | 2,2E-05 | LOC100044566 /// Ncoa1              |
| 1424223_at   | -2,27 | 7,7E-05 | 1700020C11Rik                       |
| 1428899_at   | -2,27 | 4,2E-05 | Tmem182                             |
| 1424790_at   | -2,27 | 1,0E-05 | Slc25a42                            |
| 1419248_at   | -2,26 | 1,6E-05 | Rgs2                                |
| 1422501_s_at | -2,26 | 4,4E-05 | ldh3a                               |
| 1418706_at   | -2,26 | 2,8E-05 | Slc38a3                             |
| 1419247_at   | -2,26 | 1,8E-05 | Rgs2                                |
| 1422315_x_at | -2,26 | 1,6E-05 | LOC100047682                        |
| 1452699_at   | -2,26 | 2,8E-05 | Mett11d1                            |
| 1429229_s_at | -2,26 | 3,1E-05 | 4930534B04Rik                       |
| 1458081_at   | -2,25 | 8,1E-05 | ---                                 |
| 1435763_at   | -2,25 | 2,5E-05 | Tbc1d16                             |
| 1434235_at   | -2,25 | 1,8E-05 | Slc20a2                             |
| 1433818_at   | -2,25 | 3,7E-05 | Agpat3                              |
| 1447780_x_at | -2,25 | 3,2E-05 | Tufm                                |
| 1419017_at   | -2,25 | 3,3E-05 | Corin                               |
| 1435333_at   | -2,25 | 4,7E-05 | 1110007M04Rik                       |
| 1428362_at   | -2,24 | 8,2E-05 | Eif4g2                              |
| 1455227_at   | -2,24 | 3,0E-05 | Aadacl1                             |
| 1417580_s_at | -2,24 | 2,1E-05 | LOC100044204 /// Selenbp1           |
| 1428290_at   | -2,24 | 3,1E-05 | LOC100047713 /// Mipep              |
| 1438198_at   | -2,24 | 2,4E-05 | Bri3bp                              |
| 1416275_at   | -2,23 | 3,4E-05 | Slc26a6                             |
| 1433834_at   | -2,23 | 4,6E-05 | 39513                               |
| 1416703_at   | -2,23 | 1,4E-05 | Mapk14                              |
| 1450395_at   | -2,23 | 4,0E-05 | Slc22a5                             |
| 1433873_s_at | -2,23 | 5,3E-05 | Pcnt                                |
| 1425753_a_at | -2,23 | 6,1E-05 | Ung                                 |
| 1420408_a_at | -2,22 | 2,5E-05 | Abcc9                               |
| 1429966_at   | -2,22 | 6,5E-05 | 3110057O12Rik                       |
| 1418238_at   | -2,21 | 5,6E-05 | Ivd                                 |
| 1451336_at   | -2,21 | 3,4E-05 | Lgals4                              |
| 1439476_at   | -2,21 | 4,8E-05 | Dsg2                                |
| 1429822_at   | -2,21 | 3,1E-05 | 4633401B06Rik                       |

|              |       |         |                           |
|--------------|-------|---------|---------------------------|
| 1418715_at   | -2,21 | 9,9E-05 | Pank1                     |
| 1455991_at   | -2,21 | 4,4E-05 | Ccbl2                     |
| 1449398_at   | -2,21 | 1,3E-04 | Rpl3l                     |
| 1450187_a_at | -2,21 | 8,0E-05 | Galt                      |
| 1448382_at   | -2,20 | 5,6E-05 | Ehhadh                    |
| 1417383_at   | -2,20 | 3,8E-05 | Entpd5                    |
| 1448038_at   | -2,20 | 6,2E-05 | ---                       |
| 1416679_at   | -2,20 | 4,4E-05 | Abcd3                     |
| 1423785_at   | -2,20 | 4,0E-05 | Egln1                     |
| 1428926_at   | -2,20 | 3,7E-05 | 1110003O08Rik             |
| 1434672_at   | -2,20 | 7,3E-05 | Gpr22                     |
| 1437765_at   | -2,20 | 1,2E-04 | Cpeb3                     |
| 1441285_at   | -2,19 | 4,8E-05 | 4833426J09Rik             |
| 1444531_at   | -2,19 | 2,2E-05 | ---                       |
| 1418485_at   | -2,19 | 7,8E-05 | Slc4a3                    |
| 1438317_a_at | -2,19 | 8,0E-05 | Endog                     |
| 1418068_at   | -2,19 | 9,5E-05 | Ndufa10                   |
| 1448337_at   | -2,19 | 3,9E-05 | Uqcc                      |
| 1434354_at   | -2,19 | 1,9E-05 | Maob                      |
| 1428440_at   | -2,19 | 8,5E-05 | Slc25a12                  |
| 1449944_a_at | -2,18 | 7,1E-05 | Sec61a2                   |
| 1455358_at   | -2,18 | 5,1E-05 | A2bp1                     |
| 1418584_at   | -2,18 | 1,4E-04 | Ccnh                      |
| 1423764_s_at | -2,18 | 1,7E-04 | Mrpl37                    |
| 1436219_at   | -2,18 | 4,7E-05 | 4933403F05Rik             |
| 1426856_at   | -2,17 | 1,8E-04 | Hsd12                     |
| 1433101_at   | -2,17 | 1,3E-04 | 9030419F21Rik             |
| 1449935_a_at | -2,17 | 1,9E-04 | Dnaja3                    |
| 1428323_at   | -2,17 | 6,2E-05 | Gpd2                      |
| 1418372_at   | -2,17 | 9,0E-05 | Adsl                      |
| 1456215_at   | -2,17 | 1,1E-04 | Tfam                      |
| 1424703_at   | -2,17 | 8,5E-05 | Hemk1                     |
| 1440494_at   | -2,17 | 3,2E-05 | ---                       |
| 1456716_s_at | -2,17 | 1,6E-04 | 3110002H16Rik             |
| 1435787_at   | -2,17 | 6,7E-05 | Ppm1l                     |
| 1424669_at   | -2,17 | 8,2E-05 | Zfyve21                   |
| 1455061_a_at | -2,17 | 9,5E-05 | Acaa2                     |
| 1416789_at   | -2,16 | 6,8E-05 | ldh3g                     |
| 1433763_at   | -2,16 | 4,7E-05 | Entpd5                    |
| 1440838_at   | -2,16 | 5,9E-05 | ---                       |
| 1441501_at   | -2,16 | 1,1E-04 | Serbp1                    |
| 1460434_at   | -2,15 | 4,2E-05 | Fundc2                    |
| 1449740_s_at | -2,15 | 9,1E-05 | Dsg2                      |
| 1450699_at   | -2,15 | 9,4E-05 | LOC100044204 /// Selenbp1 |
| 1451204_at   | -2,15 | 7,4E-05 | Scara5                    |
| 1421836_at   | -2,15 | 1,3E-04 | Mtap7                     |
| 1417661_at   | -2,15 | 1,5E-04 | Rdm1                      |
| 1452335_at   | -2,15 | 7,7E-05 | Mfsd8                     |
| 1451148_at   | -2,15 | 4,1E-05 | LOC100047214 /// Pink1    |
| 1420890_at   | -2,14 | 2,4E-04 | Hccs                      |
| 1416341_at   | -2,14 | 1,7E-04 | Polr2c                    |
| 1426265_x_at | -2,14 | 1,1E-04 | Dlat                      |
| 1428091_at   | -2,14 | 8,7E-05 | Klh7                      |
| 1452913_at   | -2,14 | 1,4E-04 | Pcp4l1                    |
| 1436168_at   | -2,14 | 1,8E-04 | C730029A08Rik             |
| 1417384_at   | -2,14 | 7,6E-05 | Entpd5                    |
| 1455374_at   | -2,14 | 7,7E-05 | Kcnj3                     |

|              |       |         |                           |
|--------------|-------|---------|---------------------------|
| 1417908_s_at | -2,14 | 6,6E-05 | LOC100045890 /// Ube2l3   |
| 1431833_a_at | -2,13 | 1,2E-04 | Hmgcs2                    |
| 1428299_at   | -2,13 | 1,4E-04 | Dyrk1a                    |
| 1423679_at   | -2,13 | 1,1E-04 | 2810432L12Rik             |
| 1418988_at   | -2,13 | 1,3E-04 | Pex7                      |
| 1427158_at   | -2,13 | 1,8E-04 | Mrps30                    |
| 1433753_x_at | -2,13 | 1,2E-04 | Eral1                     |
| 1434487_at   | -2,13 | 9,7E-05 | Mef2d                     |
| 1435280_at   | -2,13 | 1,0E-04 | Al452195                  |
| 1453687_at   | -2,13 | 1,4E-04 | Slc4a3                    |
| 1424126_at   | -2,13 | 2,3E-04 | Alas1                     |
| 1434977_at   | -2,13 | 8,1E-05 | 4933403F05Rik             |
| 1419072_at   | -2,12 | 1,0E-04 | Gstm7                     |
| 1448484_at   | -2,12 | 1,5E-04 | Amd-ps3 /// Amd1 /// Amd2 |
| 1452005_at   | -2,12 | 2,6E-04 | Dlat                      |
| 1435004_at   | -2,12 | 1,4E-04 | Pank4                     |
| 1437797_at   | -2,12 | 1,5E-04 | Atp2a2                    |
| 1435658_at   | -2,12 | 6,7E-05 | Slc27a1                   |
| 1455288_at   | -2,12 | 1,6E-04 | 1110036O03Rik             |
| 1415958_at   | -2,12 | 7,9E-05 | Slc2a4                    |
| 1438183_x_at | -2,11 | 2,0E-04 | Sord                      |
| 1426376_at   | -2,11 | 8,4E-05 | Reep5                     |
| 1417008_at   | -2,11 | 1,3E-04 | Crat                      |
| 1417212_at   | -2,11 | 1,7E-04 | 9530058B02Rik             |
| 1431012_a_at | -2,11 | 3,2E-04 | Peci                      |
| 1435751_at   | -2,11 | 1,9E-04 | Abcc9                     |
| 1436689_a_at | -2,11 | 1,8E-04 | Aldh9a1                   |
| 1416647_at   | -2,11 | 1,3E-04 | Bckdha                    |
| 1435264_at   | -2,10 | 7,6E-05 | Emilin2                   |
| 1418886_s_at | -2,10 | 2,2E-04 | ldh3b                     |
| 1447842_x_at | -2,10 | 1,7E-04 | ---                       |
| 1430633_s_at | -2,10 | 1,7E-04 | C430045118Rik             |
| 1454964_at   | -2,10 | 2,1E-04 | BC021395                  |
| 1424670_s_at | -2,10 | 1,8E-04 | Zfyve21                   |
| 1433919_at   | -2,10 | 1,9E-04 | Asb4                      |
| 1435127_a_at | -2,10 | 1,8E-04 | Osgepl1                   |
| 1437866_at   | -2,10 | 2,4E-04 | Dusp18                    |
| 1419583_at   | -2,10 | 1,5E-04 | Cbx4                      |
| 1449544_a_at | -2,10 | 2,2E-04 | Kcnh2 /// LOC100047076    |
| 1426857_a_at | -2,10 | 2,7E-04 | Hsd1l2                    |
| 1416202_at   | -2,10 | 2,0E-04 | Phb2                      |
| 1454749_at   | -2,09 | 2,1E-04 | Pcnt                      |
| 1450880_at   | -2,09 | 2,8E-04 | Mrpl16                    |
| 1448563_at   | -2,09 | 2,1E-04 | Phb                       |
| 1420543_at   | -2,09 | 1,1E-04 | ORF28                     |
| 1431980_a_at | -2,09 | 1,9E-04 | As3mt                     |
| 1455785_at   | -2,09 | 3,2E-04 | Kcna1                     |
| 1420444_at   | -2,09 | 1,1E-04 | Slc22a3                   |
| 1437742_at   | -2,09 | 3,4E-04 | Rab21                     |
| 1418117_at   | -2,09 | 3,0E-04 | Ndufs4                    |
| 1431002_x_at | -2,09 | 2,5E-04 | Fahd2a                    |
| 1434449_at   | -2,09 | 1,2E-04 | Aqp4                      |
| 1455372_at   | -2,09 | 3,0E-04 | Cpeb3                     |
| 1452173_at   | -2,08 | 1,9E-04 | Hadha                     |
| 1438217_at   | -2,08 | 1,3E-04 | A2bp1                     |
| 1436358_at   | -2,08 | 2,0E-04 | Atpaf1                    |
| 1438322_x_at | -2,08 | 1,7E-04 | Fdft1                     |

|              |       |         |                                                                                                                                                                                       |
|--------------|-------|---------|---------------------------------------------------------------------------------------------------------------------------------------------------------------------------------------|
| 1419869_s_at | -2,08 | 7,2E-05 | Hdlbp                                                                                                                                                                                 |
| 1424226_at   | -2,08 | 1,3E-04 | 9030617O03Rik                                                                                                                                                                         |
| 1445841_at   | -2,08 | 1,5E-04 | Lrrc39                                                                                                                                                                                |
| 1428788_at   | -2,08 | 1,7E-04 | 1700012G19Rik                                                                                                                                                                         |
| 1440769_at   | -2,08 | 2,4E-04 | 2010305A19Rik                                                                                                                                                                         |
| 1453216_at   | -2,08 | 1,1E-04 | Gpt                                                                                                                                                                                   |
| 1443546_at   | -2,08 | 2,6E-04 | ---                                                                                                                                                                                   |
| 1434673_at   | -2,08 | 3,4E-04 | Gpr22                                                                                                                                                                                 |
| 1431354_a_at | -2,07 | 6,2E-05 | Fars2                                                                                                                                                                                 |
| 1449547_at   | -2,07 | 2,6E-04 | Asb14 /// Dnahc12                                                                                                                                                                     |
| 1428014_at   | -2,07 | 3,2E-04 | Hist1h4a /// Hist1h4b ///<br>Hist1h4c /// Hist1h4d /// Hist1h4f<br>/// Hist1h4h /// Hist1h4i ///<br>Hist1h4j /// Hist1h4k ///<br>Hist1h4m /// Hist2h4 /// Hist4h4<br>/// LOC100041230 |
| 1429083_at   | -2,07 | 2,0E-04 | Ag1                                                                                                                                                                                   |
| 1416534_at   | -2,07 | 8,4E-04 | Dpf2                                                                                                                                                                                  |
| 1453355_at   | -2,07 | 2,3E-04 | Wnk2                                                                                                                                                                                  |
| 1416909_at   | -2,07 | 4,1E-04 | Pigyl                                                                                                                                                                                 |
| 1453795_at   | -2,07 | 3,5E-04 | Fahd2a                                                                                                                                                                                |
| 1441306_at   | -2,07 | 5,2E-04 | 6820408C15Rik                                                                                                                                                                         |
| 1428145_at   | -2,07 | 3,2E-04 | Acaa2                                                                                                                                                                                 |
| 1452341_at   | -2,07 | 1,4E-04 | Echs1                                                                                                                                                                                 |
| 1449118_at   | -2,07 | 4,3E-04 | Dbt                                                                                                                                                                                   |
| 1434155_a_at | -2,06 | 1,9E-04 | 2310061I04Rik                                                                                                                                                                         |
| 1427251_at   | -2,06 | 2,8E-04 | Atp2a2                                                                                                                                                                                |
| 1427250_at   | -2,06 | 2,7E-04 | Atp2a2                                                                                                                                                                                |
| 1425228_a_at | -2,06 | 5,2E-04 | Dguok                                                                                                                                                                                 |
| 1436315_at   | -2,06 | 2,0E-04 | Myst3                                                                                                                                                                                 |
| 1419367_at   | -2,06 | 3,9E-04 | Decr1                                                                                                                                                                                 |
| 1422461_at   | -2,06 | 2,3E-04 | Atad3a                                                                                                                                                                                |
| 1416373_at   | -2,06 | 1,7E-04 | Nfs1                                                                                                                                                                                  |
| 1448825_at   | -2,06 | 1,6E-04 | Pdk2                                                                                                                                                                                  |
| 1441867_x_at | -2,06 | 2,1E-04 | 4930534B04Rik                                                                                                                                                                         |
| 1425052_at   | -2,06 | 2,3E-04 | ---                                                                                                                                                                                   |
| 1429061_at   | -2,06 | 4,4E-04 | 1810063B05Rik                                                                                                                                                                         |
| 1425704_at   | -2,05 | 2,5E-04 | BC022224                                                                                                                                                                              |
| 1428106_at   | -2,05 | 1,3E-04 | 1300001I01Rik                                                                                                                                                                         |
| 1451307_at   | -2,05 | 4,5E-04 | Mrpl14                                                                                                                                                                                |
| 1446479_at   | -2,05 | 1,5E-04 | Tnni3k                                                                                                                                                                                |
| 1432435_s_at | -2,05 | 2,5E-04 | Ppp4r1l                                                                                                                                                                               |
| 1428706_at   | -2,05 | 1,7E-04 | Prr6                                                                                                                                                                                  |
| 1439662_at   | -2,05 | 2,0E-04 | Homer1                                                                                                                                                                                |
| 1418763_at   | -2,05 | 3,6E-04 | Nit2                                                                                                                                                                                  |
| 1417814_at   | -2,05 | 2,3E-04 | Pla2g5                                                                                                                                                                                |
| 1423738_at   | -2,05 | 3,0E-04 | Oxa1l                                                                                                                                                                                 |
| 1436351_at   | -2,05 | 6,4E-04 | Coq3                                                                                                                                                                                  |
| 1444956_at   | -2,05 | 2,8E-04 | ---                                                                                                                                                                                   |
| 1438790_x_at | -2,05 | 7,1E-04 | Tmem41b                                                                                                                                                                               |
| 1455541_a_at | -2,05 | 2,5E-04 | 4430402I18Rik                                                                                                                                                                         |
| 1424119_at   | -2,04 | 3,5E-04 | Prkab1                                                                                                                                                                                |
| 1429585_s_at | -2,04 | 4,3E-04 | Mynn                                                                                                                                                                                  |
| 1438319_x_at | -2,04 | 4,3E-04 | Fastkd2                                                                                                                                                                               |
| 1416319_at   | -2,04 | 3,8E-04 | Adk                                                                                                                                                                                   |
| 1416175_a_at | -2,04 | 4,7E-04 | Vdac3                                                                                                                                                                                 |
| 1434918_at   | -2,04 | 3,3E-04 | Sox6                                                                                                                                                                                  |
| 1422570_at   | -2,04 | 4,1E-04 | Yy1                                                                                                                                                                                   |

|              |       |         |                                         |
|--------------|-------|---------|-----------------------------------------|
| 1449501_a_at | -2,04 | 4,5E-04 | Gzmm                                    |
| 1455256_at   | -2,04 | 3,1E-04 | Tnik                                    |
| 1436169_at   | -2,04 | 3,2E-04 | ---                                     |
| 1447671_x_at | -2,04 | 5,6E-04 | Fbxo6                                   |
| 1428810_at   | -2,04 | 3,8E-04 | 2700097O09Rik                           |
| 1418505_at   | -2,04 | 3,8E-04 | Nudt4                                   |
| 1438018_at   | -2,04 | 2,7E-04 | Hook1                                   |
| 1449628_s_at | -2,04 | 3,5E-04 | Stard7                                  |
| 1443932_at   | -2,04 | 1,7E-04 | Klhdc1                                  |
| 1417382_at   | -2,03 | 3,6E-04 | Entpd5                                  |
| 1436173_at   | -2,03 | 7,1E-04 | Dlc1                                    |
| 1424553_at   | -2,03 | 4,4E-04 | Hhatl                                   |
| 1444307_at   | -2,03 | 2,7E-04 | ---                                     |
| 1417970_at   | -2,03 | 3,7E-04 | Atp5s                                   |
| 1437077_at   | -2,03 | 5,5E-04 | Dcun1d2                                 |
| 1451270_at   | -2,03 | 2,8E-04 | Dusp18                                  |
| 1420657_at   | -2,03 | 3,4E-04 | Ucp3                                    |
| 1432107_at   | -2,03 | 3,7E-04 | 2310010M20Rik                           |
| 1433100_at   | -2,03 | 3,6E-04 | Lmf2                                    |
| 1428614_at   | -2,03 | 2,8E-04 | Ldhd                                    |
| 1416788_a_at | -2,03 | 3,4E-04 | ldh3g                                   |
| 1437840_s_at | -2,03 | 5,8E-04 | D2hgdh                                  |
| 1435941_at   | -2,02 | 3,5E-04 | Rhbdl3                                  |
| 1451322_at   | -2,02 | 2,7E-04 | Cmb1                                    |
| 1418586_at   | -2,02 | 3,4E-04 | Adcy9                                   |
| 1424392_at   | -2,02 | 3,1E-04 | Adhfe1                                  |
| 1454771_at   | -2,02 | 4,7E-04 | LOC100040297 ///<br>LOC100040305        |
| 1421848_at   | -2,02 | 3,8E-04 | Slc22a5                                 |
| 1454868_at   | -2,02 | 3,6E-04 | Tmem201                                 |
| 1428745_a_at | -2,02 | 4,2E-04 | 2310003L22Rik                           |
| 1450969_at   | -2,02 | 6,4E-04 | Pccb                                    |
| 1435551_at   | -2,02 | 5,4E-04 | Fhod3                                   |
| 1444318_at   | -2,02 | 2,6E-04 | Chchd7                                  |
| 1416823_a_at | -2,02 | 3,4E-04 | Osbpl1a                                 |
| 1423438_at   | -2,02 | 6,6E-04 | Kptn                                    |
| 1450387_s_at | -2,02 | 3,6E-04 | Ak311 /// LOC100047616 ///<br>LOC635960 |
| 1447830_s_at | -2,02 | 3,3E-04 | Rgs2                                    |
| 1417582_s_at | -2,02 | 3,1E-04 | Dhodh                                   |
| 1428025_s_at | -2,02 | 3,3E-04 | Pitpnc1                                 |
| 1437967_at   | -2,01 | 3,5E-04 | ---                                     |
| 1452671_s_at | -2,01 | 5,2E-04 | Lman1                                   |
| 1416793_at   | -2,01 | 8,6E-04 | Arl6ip2                                 |
| 1433486_at   | -2,01 | 3,0E-04 | Clcn3                                   |
| 1443833_at   | -2,01 | 5,4E-04 | ---                                     |
| 1455025_at   | -2,01 | 3,7E-04 | Paqr9                                   |
| 1439994_at   | -2,01 | 5,4E-04 | ---                                     |
| 1429071_at   | -2,01 | 4,7E-04 | Me3                                     |
| 1437662_at   | -2,01 | 6,1E-04 | Acsm5                                   |
| 1416749_at   | -2,01 | 5,1E-04 | Htra1                                   |
| 1443198_at   | -2,01 | 6,4E-04 | ---                                     |
| 1416998_at   | -2,00 | 5,4E-04 | Rrs1                                    |
| 1451085_at   | -2,00 | 6,4E-04 | C030006K11Rik                           |
| 1431619_a_at | -2,00 | 4,9E-04 | Dtnbp1                                  |
| 1460358_s_at | -2,00 | 6,4E-04 | Nudt22                                  |
| 1450268_at   | -2,00 | 7,7E-04 | Figf                                    |
| 1428613_at   | -2,00 | 4,5E-04 | Ldhd                                    |

|              |       |         |                                             |
|--------------|-------|---------|---------------------------------------------|
| 1434909_at   | -2,00 | 6,1E-04 | Rragd                                       |
| 1417264_at   | -2,00 | 7,1E-04 | Coq5                                        |
| 1417775_at   | -2,00 | 5,4E-04 | Rpo1-4                                      |
| 1456176_x_at | -2,00 | 8,1E-04 | Slc25a39                                    |
| 1439675_at   | -2,00 | 8,0E-04 | Ppara                                       |
| 1435232_x_at | -2,00 | 9,0E-04 | Mrpl15                                      |
| 1427903_at   | -2,00 | 9,3E-04 | Phpt1                                       |
| 1426585_s_at | -2,00 | 5,9E-04 | Mapk1                                       |
| 1423908_at   | -2,00 | 5,2E-04 | Ndufs8                                      |
| 1435553_at   | -2,00 | 3,0E-04 | Pdzd2                                       |
| 1437142_a_at | -1,99 | 8,0E-04 | Pigo                                        |
| 1428075_at   | -1,99 | 9,7E-04 | LOC100041273 ///<br>LOC100042503 /// Ndufb4 |
| 1434002_at   | -1,99 | 4,9E-04 | Foxn3                                       |
| 1460081_at   | -1,99 | 5,4E-04 | Syt7                                        |
| 1416273_at   | -1,99 | 1,0E-03 | Tnfaip2                                     |
| 1423109_s_at | -1,99 | 5,4E-04 | Slc25a20                                    |
| 1435995_at   | -1,99 | 9,5E-04 | Mrpl22                                      |
| 1424433_at   | -1,99 | 2,7E-04 | Msrb2                                       |
| 1460216_at   | -1,99 | 3,3E-04 | Acads                                       |
| 1433856_at   | -1,99 | 4,9E-04 | Hisppd1                                     |
| 1454621_s_at | -1,99 | 6,1E-04 | 5730472N09Rik                               |
| 1418497_at   | -1,99 | 2,9E-04 | Fgf13                                       |
| 1436795_at   | -1,99 | 6,5E-04 | 9630058J23Rik                               |
| 1455007_s_at | -1,99 | 4,0E-04 | Gpt2                                        |
| 1440187_at   | -1,99 | 7,9E-04 | Taf3                                        |
| 1448666_s_at | -1,99 | 6,0E-04 | Tob2                                        |
| 1418968_at   | -1,99 | 6,9E-04 | Rb1cc1                                      |
| 1451488_at   | -1,99 | 6,9E-04 | 1110028A07Rik                               |
| 1448391_at   | -1,99 | 5,1E-04 | Rab9                                        |
| 1438155_x_at | -1,99 | 7,8E-04 | Pigo                                        |
| 1451339_at   | -1,99 | 5,6E-04 | Suox                                        |
| 1424946_a_at | -1,99 | 5,8E-04 | Mtfr1                                       |
| 1424322_at   | -1,98 | 6,6E-04 | Apex2                                       |
| 1456838_at   | -1,98 | 6,4E-04 | BC072620                                    |
| 1440343_at   | -1,98 | 4,1E-04 | Rps6ka5                                     |
| 1425954_a_at | -1,98 | 7,6E-04 | Apex2                                       |
| 1448626_at   | -1,98 | 8,2E-04 | Cdk5rap1                                    |
| 1417962_s_at | -1,98 | 6,9E-04 | Ghr                                         |
| 1446065_at   | -1,98 | 6,9E-04 | ---                                         |
| 1451559_a_at | -1,98 | 6,5E-04 | Dhrs4                                       |
| 1434717_at   | -1,98 | 1,0E-03 | Cul3                                        |
| 1443575_at   | -1,98 | 9,0E-04 | 2310040G24Rik                               |
| 1423373_at   | -1,98 | 6,4E-04 | Rpp30                                       |
| 1438775_at   | -1,98 | 7,1E-04 | ---                                         |
| 1418709_at   | -1,98 | 9,0E-04 | Cox7a1                                      |
| 1438385_s_at | -1,98 | 5,0E-04 | Gpt2                                        |
| 1443849_x_at | -1,98 | 8,2E-04 | Urod                                        |
| 1426689_s_at | -1,98 | 6,4E-04 | Sdha                                        |
| 1435066_at   | -1,98 | 2,3E-04 | Pitpnc1                                     |
| 1419550_a_at | -1,97 | 6,2E-04 | Stk39                                       |
| 1438431_at   | -1,97 | 5,9E-04 | Abcd2                                       |
| 1434971_x_at | -1,97 | 1,1E-03 | Mrpl15                                      |
| 1440555_at   | -1,97 | 3,3E-04 | Rragd                                       |
| 1434978_at   | -1,97 | 6,7E-04 | 4933403F05Rik                               |
| 1433813_at   | -1,97 | 9,2E-04 | ---                                         |
| 1441316_at   | -1,97 | 9,0E-04 | LOC677060 /// Wnt8b                         |
| 1435329_at   | -1,97 | 9,8E-04 | Fbxl11                                      |

|              |       |         |                                     |
|--------------|-------|---------|-------------------------------------|
| 1428657_at   | -1,97 | 9,4E-04 | Rreb1                               |
| 1439062_at   | -1,97 | 7,4E-04 | Kbtbd3 /// LOC100044210             |
| 1416148_at   | -1,97 | 6,7E-04 | Laptm4b                             |
| 1428237_at   | -1,97 | 8,1E-04 | 2700059D21Rik ///<br>LOC100046298   |
| 1424986_s_at | -1,97 | 6,7E-04 | Fbxw7                               |
| 1443260_at   | -1,97 | 8,6E-04 | Meis1                               |
| 1455286_at   | -1,97 | 7,7E-04 | Btbd1                               |
| 1419074_at   | -1,97 | 6,6E-04 | Chac2                               |
| 1427904_s_at | -1,97 | 9,4E-04 | 2410091C18Rik                       |
| 1448136_at   | -1,97 | 7,0E-04 | Enpp2                               |
| 1434893_at   | -1,97 | 7,1E-04 | Atp1a2                              |
| 1438006_at   | -1,96 | 5,8E-04 | 4933439F18Rik                       |
| 1455087_at   | -1,96 | 5,8E-04 | D7Ertd715e                          |
| 1433509_s_at | -1,96 | 6,8E-04 | Reep1                               |
| 1436934_s_at | -1,96 | 6,1E-04 | Aco2                                |
| 1451266_at   | -1,96 | 6,9E-04 | Mrpl50                              |
| 1460192_at   | -1,96 | 8,4E-04 | Osbpl1a                             |
| 1416879_at   | -1,96 | 9,7E-04 | Mrpl51                              |
| 1455376_at   | -1,96 | 5,4E-04 | 1300010F03Rik                       |
| 1421063_s_at | -1,96 | 8,0E-04 | LOC100044139 /// Snrpn ///<br>Snurf |
| 1426884_at   | -1,96 | 9,3E-04 | Rmnd5a                              |
| 1428181_at   | -1,96 | 1,1E-03 | Etfb                                |
| 1439029_at   | -1,96 | 5,8E-04 | Gpt2                                |
| 1455506_at   | -1,96 | 7,4E-04 | Slc25a34                            |
| 1437377_a_at | -1,96 | 6,8E-04 | Polrmt                              |
| 1418658_at   | -1,96 | 7,8E-04 | 2410005O16Rik                       |
| 1435743_at   | -1,96 | 5,1E-04 | Kihl23                              |
| 1424184_at   | -1,96 | 1,2E-03 | Acadvl                              |
| 1437100_x_at | -1,96 | 7,9E-04 | Pim3                                |
| 1415702_a_at | -1,96 | 5,6E-04 | Ctbp1 /// LOC100045360              |
| 1436318_at   | -1,96 | 9,2E-04 | Tardbp                              |
| 1428812_at   | -1,96 | 6,0E-04 | 1700040L02Rik                       |
| 1422795_at   | -1,96 | 8,1E-04 | Cul3                                |
| 1430201_at   | -1,95 | 1,0E-03 | 9130017K11Rik                       |
| 1456541_x_at | -1,95 | 8,5E-04 | Atad3a                              |
| 1455724_at   | -1,95 | 8,8E-04 | Prrg1                               |
| 1456981_at   | -1,95 | 9,5E-04 | Tmc7                                |
| 1425382_a_at | -1,95 | 1,0E-03 | Aqp4                                |
| 1444025_at   | -1,95 | 5,5E-04 | Kcnj3                               |
| 1444184_at   | -1,95 | 9,4E-04 | Alkbh3                              |
| 1424052_at   | -1,95 | 8,2E-04 | Thap4                               |
| 1450884_at   | -1,95 | 1,9E-03 | Cd36                                |
| 1437243_at   | -1,95 | 7,1E-04 | D2hgdh                              |
| 1429064_at   | -1,95 | 8,6E-04 | Dip2c                               |
| 1451088_a_at | -1,95 | 5,5E-04 | Oxa1l                               |
| 1436331_at   | -1,95 | 6,8E-04 | Vps13d                              |
| 1437947_x_at | -1,95 | 1,0E-03 | Vdac1                               |
| 1456512_at   | -1,95 | 7,7E-04 | Pdzrn4                              |
| 1417050_at   | -1,95 | 1,1E-03 | C1qtnf4                             |
| 1429946_at   | -1,95 | 9,2E-04 | 2610301F02Rik                       |
| 1416522_a_at | -1,95 | 1,0E-03 | Grcc10                              |
| 1447576_at   | -1,95 | 1,2E-03 | 2010001K21Rik                       |
| 1454614_at   | -1,95 | 7,0E-04 | 1810013D10Rik                       |
| 1453554_a_at | -1,95 | 1,1E-03 | Wdr33                               |
| 1448667_x_at | -1,95 | 9,4E-04 | Tob2                                |
| 1449576_at   | -1,95 | 7,5E-04 | Eif1ay                              |



|              |       |         |                                             |
|--------------|-------|---------|---------------------------------------------|
| 1457199_at   | -1,95 | 1,5E-03 | ---                                         |
| 1449697_s_at | -1,95 | 1,4E-03 | Mfn1                                        |
| 1443915_at   | -1,95 | 8,8E-04 | Mrpl47                                      |
| 1418585_at   | -1,95 | 9,8E-04 | Ccnh                                        |
| 1417765_a_at | -1,95 | 8,1E-04 | Amy1                                        |
| 1448319_at   | -1,95 | 1,1E-03 | Akr1b3                                      |
| 1420967_at   | -1,94 | 6,6E-04 | Slc25a15                                    |
| 1435399_at   | -1,94 | 9,4E-04 | Synpo2                                      |
| 1434898_at   | -1,94 | 6,5E-04 | Tnrc6a                                      |
| 1421535_a_at | -1,94 | 5,3E-04 | Pde4a                                       |
| 1451245_at   | -1,94 | 9,0E-04 | Lrrc3b                                      |
| 1429453_a_at | -1,94 | 1,6E-03 | Mrpl55                                      |
| 1452716_at   | -1,94 | 8,0E-04 | 5730469M10Rik                               |
| 1454906_at   | -1,94 | 1,6E-03 | Rarb                                        |
| 1422820_at   | -1,94 | 1,1E-03 | Lipe                                        |
| 1452015_at   | -1,94 | 1,4E-03 | 6330416G13Rik                               |
| 1448811_at   | -1,94 | 1,6E-03 | Mrpl2                                       |
| 1423713_at   | -1,94 | 7,8E-04 | Abcb8                                       |
| 1438117_x_at | -1,94 | 1,8E-03 | Tmem41b                                     |
| 1418510_s_at | -1,94 | 1,6E-03 | Fbxo8                                       |
| 1423733_a_at | -1,94 | 2,1E-03 | Fiz1                                        |
| 1422885_at   | -1,94 | 4,9E-04 | Snrpd3                                      |
| 1449641_at   | -1,94 | 1,1E-03 | Adk                                         |
| 1426773_at   | -1,94 | 1,1E-03 | Mfn1                                        |
| 1433514_at   | -1,94 | 1,0E-03 | Etnk1                                       |
| 1427114_at   | -1,94 | 1,1E-03 | Ttc19                                       |
| 1424541_at   | -1,94 | 9,4E-04 | Tmem70                                      |
| 1434265_s_at | -1,93 | 6,4E-04 | Ank2                                        |
| 1460200_s_at | -1,93 | 8,1E-04 | Lztf1                                       |
| 1429144_at   | -1,93 | 1,1E-03 | Prei4                                       |
| 1425143_a_at | -1,93 | 8,0E-04 | Ndufs1                                      |
| 1431190_x_at | -1,93 | 1,9E-03 | Fahd2a                                      |
| 1437286_x_at | -1,93 | 9,2E-04 | 1110020G09Rik                               |
| 1455475_at   | -1,93 | 1,6E-03 | 3110057O12Rik                               |
| 1456865_x_at | -1,93 | 1,4E-03 | Rrs1                                        |
| 1425455_a_at | -1,93 | 1,6E-03 | Churc1                                      |
| 1418288_at   | -1,93 | 1,0E-03 | Lpin1                                       |
| 1455166_at   | -1,93 | 1,2E-03 | Arl5b                                       |
| 1428557_a_at | -1,93 | 1,2E-03 | Osgepl1                                     |
| 1452477_at   | -1,93 | 1,1E-03 | 3110057O12Rik                               |
| 1448104_at   | -1,93 | 1,3E-03 | Aldh6a1                                     |
| 1457039_at   | -1,93 | 8,2E-04 | Cecr2                                       |
| 1429213_at   | -1,93 | 9,6E-04 | 2310030N02Rik                               |
| 1441588_at   | -1,93 | 1,3E-03 | Kcnq1ot1                                    |
| 1429260_at   | -1,93 | 9,2E-04 | 1810014B01Rik                               |
| 1439493_at   | -1,93 | 1,1E-03 | Zfp827                                      |
| 1443306_at   | -1,93 | 1,6E-03 | ---                                         |
| 1428516_a_at | -1,93 | 1,4E-03 | Alkbh7                                      |
| 1428076_s_at | -1,93 | 1,6E-03 | LOC100041273 ///<br>LOC100042503 /// Ndufb4 |
| 1428073_a_at | -1,92 | 1,3E-03 | Nup88                                       |
| 1452204_at   | -1,92 | 7,6E-04 | Anks1                                       |
| 1438024_at   | -1,92 | 1,1E-03 | ---                                         |
| 1451392_at   | -1,92 | 1,4E-03 | LOC100047355 /// Rbed1                      |
| 1441751_at   | -1,92 | 9,6E-04 | AW493563                                    |
| 1430485_at   | -1,92 | 1,5E-03 | Trpc2                                       |
| 1423883_at   | -1,92 | 2,5E-03 | Acs1                                        |
| 1422589_at   | -1,92 | 1,2E-03 | Rab3a                                       |

|              |       |         |                                   |
|--------------|-------|---------|-----------------------------------|
| 1448645_at   | -1,92 | 1,0E-03 | Msi31                             |
| 1441962_at   | -1,92 | 1,1E-03 | Alox5                             |
| 1446508_at   | -1,92 | 1,2E-03 | ---                               |
| 1441185_at   | -1,92 | 1,3E-03 | Msi2                              |
| 1429228_at   | -1,92 | 8,4E-04 | 4930534B04Rik                     |
| 1447783_x_at | -1,92 | 1,6E-03 | Slc25a39                          |
| 1449001_at   | -1,92 | 1,2E-03 | Ivd                               |
| 1426916_at   | -1,92 | 1,4E-03 | Scrn3                             |
| 1454992_at   | -1,92 | 1,1E-03 | Slc7a1                            |
| 1456293_s_at | -1,92 | 1,6E-03 | Ccnh                              |
| 1434287_at   | -1,92 | 1,2E-03 | Agpat5                            |
| 1444089_at   | -1,92 | 1,3E-03 | Spnb2                             |
| 1433566_at   | -1,91 | 1,5E-03 | Rasl10b                           |
| 1449442_at   | -1,91 | 1,6E-03 | Pex11a                            |
| 1439066_at   | -1,91 | 1,0E-03 | Angpt1                            |
| 1416578_at   | -1,91 | 1,6E-03 | Rbx1                              |
| 1433835_at   | -1,91 | 1,2E-03 | Ppp3cb                            |
| 1438251_x_at | -1,91 | 1,6E-03 | Htra1                             |
| 1448672_a_at | -1,91 | 1,5E-03 | Arfgap2                           |
| 1458167_at   | -1,91 | 1,5E-03 | ---                               |
| 1448786_at   | -1,91 | 1,6E-03 | 1100001H23Rik ///<br>LOC100045163 |
| 1447655_x_at | -1,91 | 1,3E-03 | Sox6                              |
| 1455590_at   | -1,91 | 1,4E-03 | Nqo2                              |
| 1441878_s_at | -1,91 | 1,6E-03 | 1810049H13Rik                     |
| 1424177_at   | -1,91 | 7,3E-04 | Tmem38a                           |
| 1423086_at   | -1,91 | 1,5E-03 | Npc1                              |
| 1433738_at   | -1,91 | 1,5E-03 | Papd5                             |
| 1428588_a_at | -1,91 | 2,4E-03 | Mrpl41                            |
| 1433545_s_at | -1,91 | 9,2E-04 | Acad11 /// Nphp3                  |
| 1425341_at   | -1,91 | 1,2E-03 | Kcnk3                             |
| 1440285_at   | -1,91 | 1,3E-03 | Ppp1r9a                           |
| 1437364_at   | -1,91 | 1,9E-03 | Coq3                              |
| 1416972_at   | -1,91 | 2,9E-03 | EG434401 /// Nhp211               |
| 1416665_at   | -1,91 | 2,0E-03 | Coq7                              |
| 1416210_at   | -1,91 | 2,6E-03 | Imp3                              |
| 1448318_at   | -1,91 | 2,3E-03 | Adfp                              |
| 1453303_at   | -1,90 | 2,2E-03 | 4833417J20Rik                     |
| 1437398_a_at | -1,90 | 1,5E-03 | Aldh9a1                           |
| 1440545_at   | -1,90 | 1,4E-03 | ENSMUSG00000075319                |
| 1417220_at   | -1,90 | 1,5E-03 | Fah                               |
| 1448970_at   | -1,90 | 1,3E-03 | Slc25a46                          |
| 1418254_at   | -1,90 | 1,7E-03 | Apip /// LOC100044135             |
| 1460061_at   | -1,90 | 1,3E-03 | ---                               |
| 1428495_at   | -1,90 | 1,5E-03 | 2410003K15Rik                     |
| 1435371_x_at | -1,90 | 1,6E-03 | Ces3                              |
| 1437985_a_at | -1,90 | 2,1E-03 | 2310061I04Rik                     |
| 1439502_at   | -1,90 | 5,5E-04 | 4930573I19Rik                     |
| 1428134_at   | -1,90 | 1,4E-03 | Coq9                              |
| 1454921_at   | -1,90 | 2,2E-03 | Gm561                             |
| 1454137_s_at | -1,90 | 9,7E-04 | Hfe2                              |
| 1441042_at   | -1,90 | 1,7E-03 | Fgf1                              |
| 1444682_at   | -1,90 | 1,3E-03 | BC037032                          |
| 1447745_at   | -1,90 | 2,0E-03 | Aqp4                              |
| 1423085_at   | -1,90 | 2,1E-03 | Efnb3                             |
| 1451176_at   | -1,90 | 1,5E-03 | D430028G21Rik                     |
| 1426796_at   | -1,90 | 1,4E-03 | Kpna6                             |
| 1449088_at   | -1,89 | 2,2E-03 | Fbp2                              |

|              |       |         |                    |
|--------------|-------|---------|--------------------|
| 1438338_at   | -1,89 | 3,2E-03 | Mdh1               |
| 1427073_at   | -1,89 | 1,8E-03 | Lace1              |
| 1452151_at   | -1,89 | 1,1E-03 | Gramd4             |
| 1418134_at   | -1,89 | 1,5E-03 | Slc25a46           |
| 1426979_at   | -1,89 | 1,3E-03 | Mlxip              |
| 1417290_at   | -1,89 | 2,3E-03 | Lrg1               |
| 1430896_s_at | -1,89 | 2,6E-03 | Nudt7              |
| 1427522_at   | -1,89 | 1,8E-03 | Arhgap20           |
| 1415891_at   | -1,89 | 2,2E-03 | Suclg1             |
| 1418182_at   | -1,89 | 1,9E-03 | Ptp4a3             |
| 1416555_at   | -1,89 | 1,5E-03 | Ei24               |
| 1454640_at   | -1,89 | 1,8E-03 | Chchd7             |
| 1416427_at   | -1,89 | 2,1E-03 | Ccni               |
| 1454991_at   | -1,89 | 1,5E-03 | Slc7a1             |
| 1448032_at   | -1,89 | 2,4E-03 | Azi2               |
| 1452172_at   | -1,89 | 3,0E-03 | Fastkd2            |
| 1419547_at   | -1,89 | 1,9E-03 | Fahd1              |
| 1417668_at   | -1,89 | 1,5E-03 | Rtn4ip1            |
| 1425543_s_at | -1,89 | 2,0E-03 | Plekha5            |
| 1416570_s_at | -1,89 | 1,6E-03 | Gfm1               |
| 1420485_at   | -1,89 | 1,5E-03 | Nol7               |
| 1417841_at   | -1,89 | 2,0E-03 | Pxmp2              |
| 1429188_at   | -1,89 | 1,8E-03 | Cox11              |
| 1434469_at   | -1,89 | 1,8E-03 | Otud4              |
| 1441139_at   | -1,89 | 1,6E-03 | ENSMUSG00000071543 |
| 1417649_at   | -1,89 | 1,5E-03 | Cdkn1c             |
| 1437385_at   | -1,89 | 1,7E-03 | Ccbe1              |
| 1429110_a_at | -1,89 | 2,3E-03 | Nsun4              |
| 1455336_at   | -1,89 | 1,7E-03 | Thap2              |
| 1435603_at   | -1,89 | 1,5E-03 | Sned1              |
| 1420056_s_at | -1,88 | 2,6E-03 | Jmjd6              |
| 1435637_at   | -1,88 | 2,8E-03 | Itfg1              |
| 1448196_at   | -1,88 | 2,0E-03 | Mat2b              |
| 1449629_s_at | -1,88 | 1,4E-03 | ---                |
| 1424662_at   | -1,88 | 1,4E-03 | Pmpca              |
| 1436189_at   | -1,88 | 2,2E-03 | ---                |
| 1452433_at   | -1,88 | 2,9E-03 | ---                |
| 1419815_at   | -1,88 | 2,1E-03 | Mett11d1           |
| 1416842_at   | -1,88 | 2,4E-03 | Gstm5              |
| 1452111_at   | -1,88 | 1,5E-03 | Mrps35             |
| 1453342_at   | -1,88 | 2,2E-03 | Cdc40              |
| 1425053_at   | -1,88 | 2,3E-03 | Isoc1              |
| 1450462_at   | -1,88 | 2,2E-03 | Crhr2              |
| 1438187_at   | -1,88 | 2,8E-03 | Slc25a29           |
| 1417683_at   | -1,88 | 2,1E-03 | Diablo             |
| 1453156_s_at | -1,88 | 1,9E-03 | Zadh1              |
| 1447070_at   | -1,88 | 2,6E-03 | Eif4h              |
| 1418332_a_at | -1,88 | 2,0E-03 | Agtbbp1            |
| 1422609_at   | -1,88 | 2,3E-03 | Arpp19             |
| 1424485_at   | -1,88 | 2,9E-03 | Angptl3            |
| 1420849_at   | -1,88 | 2,2E-03 | Crnk1              |
| 1452878_at   | -1,88 | 2,3E-03 | Prkce              |
| 1452308_a_at | -1,88 | 1,4E-03 | Atp1a2             |
| 1460189_at   | -1,88 | 1,7E-03 | Wdr23              |
| 1424899_at   | -1,88 | 2,9E-03 | Nmnat3             |
| 1443495_at   | -1,88 | 2,3E-03 | Atp5j2             |
| 1427997_at   | -1,88 | 3,1E-03 | 1110007M04Rik      |

|              |       |         |                       |
|--------------|-------|---------|-----------------------|
| 1433832_at   | -1,88 | 2,1E-03 | Unc84b                |
| 1460506_s_at | -1,88 | 2,1E-03 | LOC675851 /// Ndufc2  |
| 1455492_at   | -1,88 | 1,9E-03 | B330016D10Rik         |
| 1418286_a_at | -1,88 | 1,6E-03 | Efnb1                 |
| 1455204_at   | -1,88 | 1,6E-03 | Pitpnc1               |
| 1428317_at   | -1,88 | 2,9E-03 | ---                   |
| 1435701_at   | -1,88 | 2,7E-03 | ---                   |
| 1432385_a_at | -1,88 | 1,8E-03 | Agtppb1               |
| 1417310_at   | -1,87 | 1,6E-03 | Tob2                  |
| 1424480_s_at | -1,87 | 1,6E-03 | Akt2 /// LOC100048123 |
| 1416502_a_at | -1,87 | 3,3E-03 | Preb                  |
| 1450773_at   | -1,87 | 1,5E-03 | Kcnd2                 |
| 1448800_at   | -1,87 | 1,8E-03 | Rtn4ip1               |
| 1435198_at   | -1,87 | 1,5E-03 | LOC545228             |
| 1454976_at   | -1,87 | 1,7E-03 | Sod2                  |
| 1445794_at   | -1,87 | 2,0E-03 | ---                   |
| 1458425_at   | -1,87 | 2,0E-03 | ---                   |
| 1436251_at   | -1,87 | 1,7E-03 | Pde1c                 |
| 1434520_at   | -1,87 | 1,8E-03 | Sc5d                  |
| 1428816_a_at | -1,87 | 3,2E-03 | Gata2                 |
| 1452864_at   | -1,87 | 2,1E-03 | Med12l                |
| 1448491_at   | -1,87 | 2,8E-03 | Ech1                  |
| 1435446_a_at | -1,87 | 2,1E-03 | Chpt1                 |
| 1418040_at   | -1,87 | 1,7E-03 | Tmem186               |
| 1425051_at   | -1,87 | 2,2E-03 | Isoc1                 |
| 1455180_at   | -1,87 | 2,7E-03 | AA407270              |
| 1441164_at   | -1,87 | 3,0E-03 | ---                   |
| 1438938_x_at | -1,87 | 2,9E-03 | Phb2                  |
| 1418219_at   | -1,87 | 2,4E-03 | Il15                  |
| 1435934_at   | -1,87 | 2,1E-03 | Ndufab1               |
| 1418318_at   | -1,87 | 3,2E-03 | Rnf128                |
| 1415743_at   | -1,87 | 2,0E-03 | Hdac5                 |
| 1460341_at   | -1,87 | 1,9E-03 | Plekhb2               |
| 1444513_at   | -1,87 | 1,7E-03 | Cnksr2                |
| 1416294_at   | -1,87 | 2,5E-03 | Scamp3                |
| 1421012_at   | -1,87 | 2,2E-03 | Srprb                 |
| 1458501_at   | -1,87 | 1,9E-03 | Vapb                  |
| 1428996_at   | -1,87 | 1,9E-03 | 4833426J09Rik         |
| 1448714_at   | -1,86 | 2,3E-03 | Rngtt                 |
| 1460281_at   | -1,86 | 1,9E-03 | Asb15                 |
| 1416863_at   | -1,86 | 2,3E-03 | Abhd8                 |
| 1431335_a_at | -1,86 | 3,0E-03 | Wfdc1                 |
| 1446618_at   | -1,86 | 2,9E-03 | LOC432971             |
| 1451195_a_at | -1,86 | 2,4E-03 | Txndc1                |
| 1457588_at   | -1,86 | 2,8E-03 | C76213                |
| 1424716_at   | -1,86 | 2,6E-03 | Retsat                |
| 1458635_at   | -1,86 | 2,4E-03 | 4832428D23Rik         |
| 1422835_at   | -1,85 | 2,7E-03 | Kcnd2                 |
| 1424029_at   | -1,85 | 1,9E-03 | Tspyl4                |
| 1421469_a_at | -1,85 | 2,2E-03 | Stat5a                |
| 1436590_at   | -1,85 | 2,7E-03 | Ppp1r3b               |
| 1449107_at   | -1,85 | 2,4E-03 | Nudt4                 |
| 1459143_at   | -1,85 | 3,0E-03 | Chchd3                |
| 1439342_at   | -1,85 | 3,0E-03 | Clpx                  |
| 1447209_at   | -1,85 | 2,4E-03 | ---                   |
| 1451536_at   | -1,85 | 1,9E-03 | Mtfr1                 |
| 1449759_at   | -1,85 | 3,0E-03 | D11Erd326e            |

|              |       |         |                           |
|--------------|-------|---------|---------------------------|
| 1433811_at   | -1,85 | 2,5E-03 | Mllt6                     |
| 1443632_at   | -1,85 | 3,0E-03 | Obscn                     |
| 1451765_a_at | -1,85 | 2,0E-03 | Entpd5                    |
| 1431220_at   | -1,85 | 4,0E-03 | 2810416G20Rik             |
| 1417510_at   | -1,85 | 2,5E-03 | Vps4a                     |
| 1437424_at   | -1,85 | 2,8E-03 | Syde2                     |
| 1426351_at   | -1,85 | 2,3E-03 | Hspd1                     |
| 1419985_s_at | -1,85 | 3,5E-03 | Ccdc69                    |
| 1435075_at   | -1,85 | 2,3E-03 | Tmem106b                  |
| 1419097_a_at | -1,85 | 2,6E-03 | Stom                      |
| 1448774_at   | -1,85 | 3,5E-03 | Stoml2                    |
| 1418456_a_at | -1,85 | 2,0E-03 | Cxcl14                    |
| 1428824_at   | -1,85 | 3,3E-03 | 2310003C23Rik             |
| 1417694_at   | -1,85 | 3,3E-03 | Gab1                      |
| 1457110_at   | -1,85 | 2,3E-03 | Pank1                     |
| 1444536_at   | -1,84 | 2,4E-03 | AI462171                  |
| 1452097_a_at | -1,84 | 2,9E-03 | Dusp7                     |
| 1452563_a_at | -1,84 | 3,0E-03 | Jarid1d                   |
| 1452583_s_at | -1,84 | 2,7E-03 | Galm                      |
| 1448473_at   | -1,84 | 3,9E-03 | Bub3                      |
| 1439521_at   | -1,84 | 2,8E-03 | ---                       |
| 1424456_at   | -1,84 | 2,9E-03 | Pvrl2                     |
| 1443939_at   | -1,84 | 3,2E-03 | OTTMUSG00000008561        |
| 1436644_x_at | -1,84 | 4,2E-03 | Tmem25                    |
| 1419518_at   | -1,84 | 4,3E-03 | Tuba8                     |
| 1426962_at   | -1,84 | 2,9E-03 | Phf20                     |
| 1431502_a_at | -1,84 | 4,2E-03 | Exosc3                    |
| 1427473_at   | -1,84 | 2,6E-03 | Gstm3                     |
| 1457953_at   | -1,84 | 3,9E-03 | ---                       |
| 1417606_a_at | -1,84 | 2,6E-03 | Calr                      |
| 1436756_x_at | -1,84 | 2,7E-03 | Hadh                      |
| 1441086_at   | -1,84 | 3,4E-03 | 4930451111Rik             |
| 1445574_at   | -1,84 | 3,4E-03 | ---                       |
| 1436777_at   | -1,84 | 2,7E-03 | Mars2                     |
| 1443044_at   | -1,84 | 3,8E-03 | A830091E24                |
| 1416616_s_at | -1,84 | 2,9E-03 | Clpp                      |
| 1416368_at   | -1,84 | 2,9E-03 | Gsta4                     |
| 1450869_at   | -1,84 | 2,7E-03 | Fgf1                      |
| 1427202_at   | -1,84 | 2,9E-03 | 4833442J19Rik             |
| 1449983_a_at | -1,83 | 3,5E-03 | Nqo2                      |
| 1430929_at   | -1,83 | 2,8E-03 | 9430082L08Rik             |
| 1440886_at   | -1,83 | 3,1E-03 | Cdc37l1                   |
| 1439482_at   | -1,83 | 3,0E-03 | Uhrf1bp1                  |
| 1435750_at   | -1,83 | 2,5E-03 | Gchfr                     |
| 1453122_at   | -1,83 | 3,4E-03 | 4921533L14Rik             |
| 1438855_x_at | -1,83 | 3,5E-03 | Tnfaip2                   |
| 1455424_at   | -1,83 | 3,5E-03 | Wnk2                      |
| 1436185_at   | -1,83 | 2,5E-03 | AI314180                  |
| 1418583_at   | -1,83 | 3,9E-03 | Hint3                     |
| 1435981_at   | -1,83 | 3,8E-03 | Nav2                      |
| 1427321_s_at | -1,83 | 3,4E-03 | Cxadr                     |
| 1426902_at   | -1,83 | 2,9E-03 | Coq6                      |
| 1418782_at   | -1,83 | 3,3E-03 | Rxrg                      |
| 1416835_s_at | -1,83 | 3,1E-03 | Amd-ps3 /// Amd1 /// Amd2 |
| 1428342_at   | -1,83 | 4,8E-03 | Rcor3                     |
| 1418302_at   | -1,83 | 3,0E-03 | Ppt2                      |
| 1442062_at   | -1,83 | 3,4E-03 | 7120426M23Rik             |

|              |       |         |                             |
|--------------|-------|---------|-----------------------------|
| 1416595_at   | -1,83 | 3,4E-03 | Mrps22                      |
| 1457338_at   | -1,83 | 2,8E-03 | ---                         |
| 1452636_x_at | -1,83 | 4,1E-03 | Gtpbp5                      |
| 1452970_at   | -1,83 | 4,0E-03 | Zmym2                       |
| 1426475_at   | -1,83 | 3,6E-03 | Hmbs                        |
| 1443530_at   | -1,83 | 3,0E-03 | ---                         |
| 1459288_at   | -1,83 | 2,9E-03 | ---                         |
| 1424045_at   | -1,83 | 3,5E-03 | 5730437N04Rik               |
| 1456186_at   | -1,82 | 3,0E-03 | Prdm11                      |
| 1449933_a_at | -1,82 | 3,8E-03 | 5730449L18Rik               |
| 1431084_x_at | -1,82 | 3,9E-03 | 1810014B01Rik               |
| 1422526_at   | -1,82 | 3,2E-03 | Acsl1                       |
| 1416963_at   | -1,82 | 3,4E-03 | Ubac1                       |
| 1456406_at   | -1,82 | 3,3E-03 | OTTMUSG00000018617          |
| 1430417_s_at | -1,82 | 3,3E-03 | 0610025P10Rik               |
| 1416933_at   | -1,82 | 4,6E-03 | Por                         |
| 1421456_at   | -1,82 | 4,3E-03 | P2ry1                       |
| 1446123_at   | -1,82 | 3,9E-03 | B230396O12Rik               |
| 1433996_at   | -1,82 | 4,6E-03 | Suv39h2                     |
| 1441943_x_at | -1,82 | 3,6E-03 | ---                         |
| 1451768_a_at | -1,81 | 3,1E-03 | Slc20a2                     |
| 1427173_a_at | -1,81 | 3,1E-03 | Mrps33                      |
| 1437924_at   | -1,81 | 4,0E-03 | Son                         |
| 1455599_at   | -1,81 | 4,1E-03 | Gfod1                       |
| 1416535_at   | -1,81 | 4,2E-03 | Mcrs1                       |
| 1452653_at   | -1,81 | 4,4E-03 | Slc25a22                    |
| 1460571_at   | -1,81 | 4,0E-03 | Dicer1                      |
| 1451744_a_at | -1,81 | 4,3E-03 | Zadh1                       |
| 1459980_x_at | -1,81 | 4,2E-03 | Rab3a                       |
| 1434668_at   | -1,81 | 4,5E-03 | Nucks1                      |
| 1458369_at   | -1,81 | 4,6E-03 | 2310050B05Rik               |
| 1418986_a_at | -1,81 | 3,9E-03 | Uxt                         |
| 1428496_at   | -1,81 | 4,0E-03 | Secisbp2                    |
| 1450643_s_at | -1,81 | 4,8E-03 | Acsl1                       |
| 1423980_at   | -1,81 | 2,8E-03 | Slc25a29                    |
| 1427282_a_at | -1,81 | 3,5E-03 | Fxn                         |
| 1437832_x_at | -1,80 | 4,8E-03 | LOC100046672 /// Wars       |
| 1432445_at   | -1,80 | 3,9E-03 | 2310016G11Rik               |
| 1435322_at   | -1,80 | 4,7E-03 | Ankrd40                     |
| 1460445_at   | -1,80 | 3,8E-03 | Sfrs2ip                     |
| 1448308_at   | -1,80 | 4,3E-03 | Ap3m1                       |
| 1415788_at   | -1,80 | 2,9E-03 | Ublcp1                      |
| 1416848_at   | -1,80 | 4,8E-03 | Ubl5                        |
| 1438537_at   | -1,80 | 4,3E-03 | ---                         |
| 1447905_x_at | -1,80 | 4,8E-03 | Nup62                       |
| 1436791_at   | -1,80 | 3,8E-03 | Wnt5a                       |
| 1422451_at   | -1,80 | 5,1E-03 | Mrps21                      |
| 1427416_x_at | -1,80 | 5,1E-03 | Dusp7                       |
| 1444396_at   | -1,80 | 4,2E-03 | Trp53inp2                   |
| 1425140_at   | -1,80 | 5,1E-03 | Lactb2                      |
| 1447940_a_at | -1,80 | 4,6E-03 | Braf                        |
| 1438788_at   | -1,79 | 4,8E-03 | D5Wsu152e                   |
| 1447934_at   | -1,79 | 4,3E-03 | 9630033F20Rik /// LOC677429 |
| 1426841_at   | -1,79 | 4,8E-03 | Ythdf3                      |
| 1451217_a_at | -1,79 | 4,3E-03 | Immp1l                      |
| 1440163_at   | -1,79 | 5,4E-03 | 6030490B17Rik               |
| 1438452_at   | -1,79 | 5,4E-03 | Nebi                        |

|              |       |         |                                           |
|--------------|-------|---------|-------------------------------------------|
| 1428528_at   | -1,78 | 5,7E-03 | 1110007L15Rik ///<br>LOC100041982         |
| 1450259_a_at | -1,78 | 4,9E-03 | Stat5a                                    |
| 1428258_at   | -1,78 | 5,9E-03 | 2010107E04Rik                             |
| 1439102_at   | -1,78 | 6,2E-03 | Bptf                                      |
| 1452474_a_at | -1,78 | 5,7E-03 | Art3                                      |
| 1443002_at   | -1,78 | 4,8E-03 | Zfr                                       |
| 1436706_at   | -1,77 | 4,8E-03 | Tmem32                                    |
| 1446440_at   | -1,77 | 5,3E-03 | ---                                       |
| 1417387_at   | -1,77 | 7,0E-03 | Med31                                     |
| 1448938_at   | -1,77 | 5,7E-03 | Rpa3                                      |
| 1426138_a_at | -1,77 | 6,5E-03 | Ube2j2                                    |
| 1419352_at   | -1,76 | 6,8E-03 | I7Rn6                                     |
| 1437599_at   | -1,76 | 5,1E-03 | ---                                       |
| 1417103_at   | -1,76 | 6,2E-03 | Ddt                                       |
| 1431359_a_at | -1,76 | 6,9E-03 | 1110007C09Rik                             |
| 1417720_at   | -1,76 | 6,1E-03 | Polr2j                                    |
| 1436695_x_at | -1,76 | 7,1E-03 | LOC100047355 /// Rbed1                    |
| 1423191_at   | -1,76 | 6,3E-03 | Fnbp4                                     |
| 1434065_at   | -1,75 | 6,7E-03 | Cwf19l1                                   |
| 1419386_at   | -1,74 | 7,2E-03 | Muc13                                     |
| 1423911_at   | -1,74 | 5,8E-03 | LOC100046393 /// LOC545704<br>/// Ppp2r5a |
| 1428646_at   | -1,74 | 5,3E-03 | LOC676870 /// Pbx1                        |
| 1428000_at   | -1,74 | 7,5E-03 | Tmem60                                    |
| 1439517_at   | -1,74 | 5,7E-03 | ---                                       |
| 1451542_at   | -1,74 | 7,8E-03 | Ssbp2                                     |
| 1434296_at   | -1,73 | 6,2E-03 | BC049349                                  |
| 1437363_at   | -1,73 | 3,8E-03 | Homer1                                    |
| 1456302_at   | -1,73 | 7,9E-03 | Pex6                                      |
| 1449815_a_at | -1,72 | 7,7E-03 | Ssbp2                                     |
| 1418873_at   | -1,72 | 8,7E-03 | Sfxn4                                     |
| 1452876_x_at | -1,72 | 6,7E-03 | 2610044O15Rik                             |
| 1440432_at   | -1,71 | 5,8E-03 | ---                                       |
| 1452795_at   | -1,68 | 8,5E-03 | Fcf1                                      |
