# Supplementary material
Source: PubMed Central journal article supplement (PMC3293562)
Supplement: supp_M111.282210_Suppl_Table_S2_GarciaHozetal_JBC2011-282210.pdf [file supp_M111.282210_Suppl_Table_S2_GarciaHozetal_JBC2011-282210.pdf]

Table 2 Genes Up

| Probeset     | Fold change | p-val   | Gene Symbol           |
|--------------|-------------|---------|-----------------------|
| 1452656_at   | 2,16        | 1,6E-04 | Zdhhc2                |
| 1452655_at   | 2,02        | 5,1E-04 | Zdhhc2                |
| 1452654_at   | 1,88        | 1,8E-03 | Zdhhc2                |
| 1416102_at   | 1,84        | 3,8E-03 | Ywhaz                 |
| 1416004_at   | 1,95        | 7,1E-04 | Ywhah                 |
| 1447943_x_at | 1,91        | 1,8E-03 | Yeats2                |
| 1448594_at   | 1,89        | 2,7E-03 | Wisp1                 |
| 1436953_at   | 1,94        | 1,1E-03 | Wipf1                 |
| 1436954_at   | 1,93        | 1,3E-03 | Wipf1                 |
| 1419631_at   | 1,99        | 1,3E-03 | Was                   |
| 1456292_a_at | 2,56        | 9,1E-08 | Vim                   |
| 1450641_at   | 2,51        | 2,6E-07 | Vim                   |
| 1438118_x_at | 2,40        | 1,4E-06 | Vim                   |
| 1427256_at   | 2,77        | 4,4E-10 | Vcan                  |
| 1427257_at   | 2,13        | 8,1E-05 | Vcan                  |
| 1421694_a_at | 1,95        | 5,2E-04 | Vcan                  |
| 1423726_at   | 2,10        | 1,6E-04 | Vat1                  |
| 1435195_at   | 2,07        | 2,9E-04 | Vash1                 |
| 1435110_at   | 1,85        | 3,7E-03 | Unc5b                 |
| 1454920_at   | 1,78        | 5,5E-03 | Uhrf2                 |
| 1448260_at   | 2,01        | 5,9E-04 | Uchl1                 |
| 1450792_at   | 1,97        | 1,5E-03 | Tyropb                |
| 1451091_at   | 2,05        | 3,1E-04 | Txndc5                |
| 1423746_at   | 1,88        | 2,1E-03 | Txndc5                |
| 1452679_at   | 2,03        | 5,1E-04 | Tubb2b                |
| 1427347_s_at | 1,96        | 5,3E-04 | Tubb2a                |
| 1418884_x_at | 2,10        | 4,9E-05 | Tuba1a                |
| 1438948_x_at | 2,16        | 1,2E-04 | Tspo                  |
| 1456251_x_at | 1,98        | 7,5E-04 | Tspo                  |
| 1416695_at   | 1,92        | 2,0E-03 | Tspo                  |
| 1455642_a_at | 1,89        | 2,1E-03 | Tspan17               |
| 1426784_at   | 2,23        | 2,2E-05 | Trim47                |
| 1417961_a_at | 1,81        | 4,0E-03 | Trim30                |
| 1423732_at   | 2,16        | 1,3E-04 | Tram1                 |
| 1433883_at   | 2,16        | 1,0E-04 | Tpm4                  |
| 1427567_a_at | 2,18        | 6,1E-05 | Tpm3                  |
| 1427260_a_at | 1,91        | 1,1E-03 | Tpm3                  |
| 1425028_a_at | 2,02        | 4,4E-04 | Tpm2                  |
| 1449577_x_at | 2,02        | 4,8E-04 | Tpm2                  |
| 1459910_at   | 1,92        | 1,9E-03 | Tnks                  |
| 1442590_at   | 2,07        | 2,0E-04 | Tnfrsf22 /// Tnfrsf23 |
| 1418571_at   | 2,13        | 7,9E-05 | Tnfrsf12a             |
| 1418572_x_at | 2,09        | 1,3E-04 | Tnfrsf12a             |
| 1415906_at   | 2,19        | 9,7E-05 | Tmsb4x                |
| 1422587_at   | 2,19        | 2,2E-05 | Tmem45a               |
| 1418004_a_at | 1,99        | 6,5E-04 | Tmem176b              |
| 1423909_at   | 2,18        | 8,1E-05 | Tmem176a              |
| 1425603_at   | 2,08        | 1,9E-04 | Tmem176a              |
| 1426436_at   | 1,99        | 6,6E-04 | Tmem159               |
| 1451344_at   | 2,01        | 4,1E-04 | Tmem119               |
| 1418162_at   | 1,83        | 2,9E-03 | Tlr4                  |
| 1460287_at   | 2,11        | 1,7E-04 | Timp2                 |
| 1420924_at   | 1,90        | 1,2E-03 | Timp2                 |
| 1460227_at   | 2,38        | 1,5E-06 | Timp1                 |
| 1449388_at   | 2,31        | 7,1E-06 | Thbs4                 |

|              |      |         |            |
|--------------|------|---------|------------|
| 1416623_at   | 1,89 | 2,9E-03 | Thbs3      |
| 1415871_at   | 2,19 | 1,6E-04 | Tgfb1      |
| 1448123_s_at | 2,17 | 8,7E-05 | Tgfb1      |
| 1437463_x_at | 2,17 | 9,5E-05 | Tgfb1      |
| 1417455_at   | 2,11 | 3,3E-04 | Tgfb3      |
| 1450922_a_at | 2,55 | 1,8E-07 | Tgfb2      |
| 1423250_a_at | 2,38 | 2,2E-06 | Tgfb2      |
| 1450923_at   | 1,97 | 7,7E-04 | Tgfb2      |
| 1438303_at   | 1,87 | 1,5E-03 | Tgfb2      |
| 1418136_at   | 1,92 | 2,3E-03 | Tgfb1i1    |
| 1435964_a_at | 2,13 | 1,7E-04 | Taok3      |
| 1426529_a_at | 1,96 | 8,2E-04 | Tagln2     |
| 1429590_at   | 1,88 | 1,5E-03 | Tacc1      |
| 1428295_at   | 2,33 | 8,0E-06 | Synpo2l    |
| 1447657_s_at | 2,13 | 8,3E-05 | Synpo2l    |
| 1447658_x_at | 2,03 | 3,1E-04 | Synpo2l    |
| 1434089_at   | 2,34 | 2,0E-05 | Synpo      |
| 1419182_at   | 2,20 | 3,8E-05 | Svep1      |
| 1436319_at   | 2,54 | 6,1E-07 | Sulf1      |
| 1438200_at   | 2,31 | 1,3E-05 | Sulf1      |
| 1450841_at   | 2,19 | 6,1E-05 | Stt3a      |
| 1455824_x_at | 2,09 | 1,7E-04 | Stt3a      |
| 1455156_at   | 1,86 | 3,0E-03 | Strn       |
| 1415849_s_at | 1,79 | 3,2E-03 | Stmn1      |
| 1450199_a_at | 2,00 | 5,0E-04 | Stab1      |
| 1418075_at   | 1,84 | 3,1E-03 | St6galnac4 |
| 1421890_at   | 1,88 | 2,0E-03 | St3gal2    |
| 1448843_at   | 1,98 | 5,8E-04 | Ssr1       |
| 1427919_at   | 2,43 | 2,8E-06 | Srpx2      |
| 1423160_at   | 1,91 | 1,9E-03 | Spred1     |
| 1416114_at   | 1,91 | 9,6E-04 | Sparcl1    |
| 1416589_at   | 2,36 | 3,3E-06 | Sparc      |
| 1448392_at   | 2,33 | 5,4E-06 | Sparc      |
| 1450191_a_at | 2,03 | 3,9E-04 | Sox13      |
| 1437197_at   | 2,43 | 7,2E-07 | Sorbs2     |
| 1417697_at   | 1,84 | 3,4E-03 | Soat1      |
| 1431055_a_at | 2,09 | 4,8E-04 | Snx10      |
| 1416688_at   | 1,91 | 2,2E-03 | Snap91     |
| 1447643_x_at | 2,04 | 5,6E-04 | Snai2      |
| 1429045_at   | 2,10 | 1,5E-04 | Smurf2     |
| 1415935_at   | 1,85 | 3,3E-03 | Smoc2      |
| 1427275_at   | 2,11 | 2,2E-04 | Smc4       |
| 1427276_at   | 1,99 | 4,5E-04 | Smc4       |
| 1452197_at   | 1,96 | 5,6E-04 | Smc4       |
| 1448635_at   | 1,89 | 2,3E-03 | Smc2       |
| 1437744_at   | 2,33 | 1,1E-05 | Slitrk4    |
| 1417392_a_at | 1,95 | 2,2E-03 | Slc7a7     |
| 1454764_s_at | 1,88 | 1,8E-03 | Slc38a1    |
| 1434222_at   | 1,98 | 7,7E-04 | Sipa111    |
| 1437503_a_at | 2,02 | 4,6E-04 | Shisa5     |
| 1436997_x_at | 1,91 | 1,2E-03 | Sh3bgrl    |
| 1428107_at   | 1,88 | 1,3E-03 | Sh3bgrl    |
| 1448201_at   | 1,90 | 2,4E-03 | Sfrp2      |
| 1428136_at   | 2,20 | 1,4E-04 | Sfrp1      |
| 1454877_at   | 2,15 | 1,5E-04 | Sertad4    |
| 1456733_x_at | 1,92 | 1,0E-03 | Serpinh1   |
| 1416168_at   | 2,23 | 4,5E-05 | Serpinf1   |

|              |      |         |           |
|--------------|------|---------|-----------|
| 1453724_a_at | 1,89 | 1,6E-03 | Serpinf1  |
| 1450138_a_at | 2,03 | 7,3E-04 | Serpinb6a |
| 1434291_a_at | 2,23 | 9,8E-05 | Serf1     |
| 1429459_at   | 2,17 | 5,9E-05 | Sema3d    |
| 1450941_at   | 1,94 | 1,6E-03 | Sdcbp     |
| 1423332_at   | 1,93 | 1,3E-03 | Sdcbp     |
| 1428983_at   | 2,05 | 2,7E-04 | Scx       |
| 1456291_x_at | 1,86 | 1,7E-03 | Scx       |
| 1421375_a_at | 2,26 | 3,4E-06 | S100a6    |
| 1460351_at   | 2,52 | 5,3E-07 | S100a11   |
| 1416762_at   | 2,13 | 6,3E-05 | S100a10   |
| 1437224_at   | 2,28 | 2,9E-05 | Rtn4      |
| 1421116_a_at | 2,22 | 3,1E-05 | Rtn4      |
| 1452649_at   | 2,18 | 9,4E-05 | Rtn4      |
| 1434239_at   | 2,02 | 3,7E-04 | Rrp12     |
| 1449221_a_at | 1,82 | 4,2E-03 | Rrbp1     |
| 1455819_at   | 1,92 | 1,1E-03 | Rod1      |
| 1426206_at   | 1,79 | 4,2E-03 | Robo4     |
| 1452769_at   | 1,91 | 1,7E-03 | Rnf145    |
| 1448449_at   | 1,88 | 1,5E-03 | Ripk3     |
| 1449028_at   | 1,90 | 1,3E-03 | Rhou      |
| 1435394_s_at | 1,94 | 9,7E-04 | Rhoc      |
| 1424780_a_at | 2,10 | 1,0E-04 | Reep3     |
| 1424779_at   | 1,95 | 6,5E-04 | Reep3     |
| 1424382_at   | 2,23 | 3,3E-05 | Rcn3      |
| 1416601_a_at | 1,89 | 1,8E-03 | Rcan1     |
| 1416600_a_at | 1,83 | 3,3E-03 | Rcan1     |
| 1451321_a_at | 1,82 | 3,7E-03 | Rbm43     |
| 1417400_at   | 2,14 | 2,3E-04 | Rai14     |
| 1426799_at   | 1,86 | 2,5E-03 | Rab8b     |
| 1424684_at   | 1,92 | 9,5E-04 | Rab5c     |
| 1416527_at   | 2,02 | 5,7E-04 | Rab32     |
| 1416165_at   | 2,04 | 4,7E-04 | Rab31     |
| 1455030_at   | 2,15 | 1,1E-04 | Ptprj     |
| 1422124_a_at | 2,09 | 3,6E-04 | Ptprc     |
| 1450967_at   | 2,14 | 2,1E-04 | Ptplad2   |
| 1448254_at   | 1,97 | 5,9E-04 | Ptn       |
| 1448816_at   | 2,18 | 5,0E-05 | Ptgis     |
| 1434891_at   | 2,37 | 5,6E-06 | Ptgfrn    |
| 1417323_at   | 1,84 | 3,0E-03 | Psrc1     |
| 1460403_at   | 2,00 | 6,5E-04 | Psip1     |
| 1460437_at   | 1,89 | 3,0E-03 | Pscd4     |
| 1431057_a_at | 2,15 | 8,2E-05 | Prss23    |
| 1437671_x_at | 1,86 | 2,3E-03 | Prss23    |
| 1448233_at   | 1,89 | 1,6E-03 | Prnp      |
| 1425681_a_at | 2,16 | 1,0E-04 | Prnd      |
| 1437234_x_at | 1,83 | 3,4E-03 | Prmt2     |
| 1423771_at   | 2,43 | 2,8E-06 | Prkcdbp   |
| 1416321_s_at | 1,86 | 2,8E-03 | Prelp     |
| 1436194_at   | 1,97 | 5,4E-04 | Prelid2   |
| 1424906_at   | 1,93 | 7,3E-04 | Pqlc3     |
| 1454934_at   | 1,81 | 3,6E-03 | Ppm1f     |
| 1450911_at   | 2,32 | 1,4E-05 | Ppib      |
| 1423606_at   | 2,66 | 5,0E-08 | Postn     |
| 1417133_at   | 2,36 | 9,3E-06 | Pmp22     |
| 1422706_at   | 1,85 | 2,9E-03 | Pmepa1    |
| 1423725_at   | 2,32 | 2,4E-06 | Pls3      |

|              |      |         |                    |
|--------------|------|---------|--------------------|
| 1453572_a_at | 2,43 | 1,9E-06 | Plp2               |
| 1417128_at   | 2,14 | 9,3E-05 | Plekho1            |
| 1448748_at   | 2,16 | 1,1E-04 | Plek               |
| 1426926_at   | 1,99 | 5,3E-04 | Plcg2              |
| 1448558_a_at | 2,00 | 5,3E-04 | Pla2g4a            |
| 1441870_s_at | 2,13 | 1,6E-04 | Pkd2               |
| 1419280_at   | 2,23 | 5,1E-05 | Pip4k2a            |
| 1449404_at   | 1,96 | 7,3E-04 | Pip4k2a            |
| 1453839_a_at | 2,05 | 3,9E-04 | Pi16               |
| 1454862_at   | 1,89 | 2,1E-03 | Phldb2             |
| 1449002_at   | 1,94 | 1,4E-03 | Phlda3             |
| 1449018_at   | 1,78 | 4,5E-03 | Pfn1               |
| 1416069_at   | 2,16 | 3,3E-05 | Pfkip              |
| 1430634_a_at | 1,91 | 1,4E-03 | Pfkip              |
| 1448995_at   | 1,93 | 9,8E-04 | Pf4                |
| 1416406_at   | 1,93 | 1,5E-03 | Pea15a             |
| 1449330_at   | 2,00 | 5,4E-04 | Pdzd3              |
| 1419309_at   | 1,91 | 1,7E-03 | Pdpn               |
| 1423946_at   | 2,29 | 3,9E-05 | Pdlim2             |
| 1424650_at   | 2,07 | 2,6E-04 | Pdia5              |
| 1428896_at   | 2,16 | 2,2E-04 | Pdgfrl             |
| 1433761_at   | 1,82 | 3,9E-03 | Pde4dip            |
| 1451527_at   | 2,05 | 3,9E-04 | Pcolce2            |
| 1437165_a_at | 2,61 | 3,2E-08 | Pcolce             |
| 1448433_a_at | 2,54 | 4,6E-07 | Pcolce             |
| 1422889_at   | 2,12 | 1,2E-04 | Pcdh18             |
| 1453070_at   | 2,04 | 3,4E-04 | Pcdh17             |
| 1448627_s_at | 2,26 | 6,5E-05 | Pbk                |
| 1418908_at   | 1,89 | 1,6E-03 | Pam                |
| 1449380_at   | 1,86 | 2,4E-03 | Pacsin1            |
| 1418883_a_at | 1,94 | 6,5E-04 | Pabpc1             |
| 1419853_a_at | 1,95 | 1,2E-03 | P2rx7              |
| 1436530_at   | 1,68 | 8,9E-03 | OTTMUSG00000000971 |
| 1452246_at   | 2,31 | 1,3E-05 | Ostf1              |
| 1418674_at   | 1,85 | 2,1E-03 | Osmr               |
| 1427535_s_at | 1,97 | 5,3E-04 | Obsl1              |
| 1460521_a_at | 1,94 | 9,6E-04 | Obfc2a             |
| 1452203_at   | 1,81 | 4,5E-03 | Obfc2a             |
| 1419666_x_at | 2,24 | 2,9E-05 | Nupr1              |
| 1419665_a_at | 1,92 | 1,2E-03 | Nupr1              |
| 1448651_at   | 1,90 | 2,2E-03 | Nudt5              |
| 1435902_at   | 1,88 | 1,5E-03 | Nudt18             |
| 1418355_at   | 2,05 | 3,0E-04 | Nucb2              |
| 1438684_at   | 1,91 | 1,2E-03 | Nuak1              |
| 1426528_at   | 1,82 | 3,2E-03 | Nrp2               |
| 1450791_at   | 2,35 | 4,6E-06 | Nppb               |
| 1456062_at   | 2,64 | 2,3E-08 | Nppa               |
| 1451827_a_at | 2,09 | 3,1E-04 | Nox4               |
| 1416473_a_at | 1,90 | 1,5E-03 | Nope               |
| 1454919_at   | 2,09 | 2,4E-04 | Nmt2               |
| 1424981_at   | 2,01 | 8,8E-04 | Nln                |
| 1448967_at   | 1,96 | 1,1E-03 | Nipsnap3a          |
| 1428600_at   | 2,08 | 3,0E-04 | Nin                |
| 1416808_at   | 1,91 | 1,3E-03 | Nid1               |
| 1454942_at   | 2,00 | 8,8E-04 | Niban              |
| 1417145_at   | 2,04 | 4,9E-04 | Nfxl1              |
| 1428786_at   | 2,24 | 1,1E-04 | Nckap1l            |

|              |      |         |         |
|--------------|------|---------|---------|
| 1448428_at   | 2,15 | 4,7E-05 | Nbl1    |
| 1417773_at   | 2,13 | 2,0E-04 | Nans    |
| 1418031_at   | 1,88 | 2,4E-03 | Myo9b   |
| 1428509_at   | 1,97 | 1,6E-03 | Myo1e   |
| 1435463_s_at | 1,96 | 2,0E-03 | Myo1d   |
| 1449550_at   | 2,15 | 1,4E-04 | Myo1c   |
| 1419649_s_at | 1,97 | 1,0E-03 | Myo1c   |
| 1420171_s_at | 1,87 | 2,2E-03 | Myh9    |
| 1452740_at   | 2,37 | 2,8E-06 | Myh10   |
| 1455736_at   | 2,41 | 7,4E-06 | Mybpc2  |
| 1430539_at   | 2,09 | 1,7E-04 | Mxra7   |
| 1440975_at   | 1,93 | 7,4E-04 | Mxra7   |
| 1456586_x_at | 1,95 | 1,1E-03 | Mvp     |
| 1420473_at   | 2,10 | 5,9E-05 | Mtpn    |
| 1460550_at   | 2,10 | 1,3E-04 | Mtmr11  |
| 1419254_at   | 1,96 | 1,8E-03 | Mthfd2  |
| 1421814_at   | 2,42 | 3,6E-06 | Msn     |
| 1424754_at   | 2,21 | 3,8E-05 | Ms4a7   |
| 1419599_s_at | 1,88 | 2,3E-03 | Ms4a6d  |
| 1450234_at   | 1,87 | 2,9E-03 | Ms4a6c  |
| 1418826_at   | 1,87 | 3,0E-03 | Ms4a6b  |
| 1421045_at   | 2,26 | 9,4E-05 | Mrc2    |
| 1421044_at   | 2,03 | 5,9E-04 | Mrc2    |
| 1450430_at   | 2,11 | 1,7E-04 | Mrc1    |
| 1450919_at   | 1,89 | 2,1E-03 | Mpp1    |
| 1415778_at   | 1,97 | 4,9E-04 | Morf4l2 |
| 1454867_at   | 1,83 | 3,2E-03 | Mn1     |
| 1417281_a_at | 1,96 | 9,0E-04 | Mmp23   |
| 1439364_a_at | 1,89 | 2,1E-03 | Mmp2    |
| 1416313_at   | 2,16 | 4,2E-05 | Mllt11  |
| 1426817_at   | 1,95 | 6,7E-04 | Mki67   |
| 1455685_at   | 1,86 | 3,1E-03 | Mical2  |
| 1448416_at   | 2,13 | 1,4E-04 | Mgp     |
| 1449082_at   | 2,57 | 2,6E-08 | Mfap5   |
| 1418454_at   | 2,55 | 4,2E-08 | Mfap5   |
| 1424010_at   | 2,37 | 2,3E-05 | Mfap4   |
| 1417595_at   | 2,33 | 3,2E-05 | Meox1   |
| 1416030_a_at | 1,79 | 4,1E-03 | Mcm7    |
| 1434678_at   | 1,81 | 3,7E-03 | Mbnl3   |
| 1455978_a_at | 2,13 | 7,5E-05 | Matn2   |
| 1419442_at   | 2,00 | 4,6E-04 | Matn2   |
| 1455346_at   | 2,40 | 8,0E-06 | Masp1   |
| 1437226_x_at | 2,06 | 4,4E-04 | Marcks1 |
| 1415971_at   | 2,07 | 2,3E-04 | Marcks  |
| 1415973_at   | 2,03 | 5,0E-04 | Marcks  |
| 1456700_x_at | 2,02 | 4,5E-04 | Marcks  |
| 1437034_x_at | 2,01 | 5,6E-04 | Marcks  |
| 1415972_at   | 1,95 | 1,4E-03 | Marcks  |
| 1456028_x_at | 1,93 | 7,5E-04 | Marcks  |
| 1426245_s_at | 2,03 | 5,7E-04 | Mapre2  |
| 1426244_at   | 1,84 | 3,6E-03 | Mapre2  |
| 1418060_a_at | 1,85 | 2,3E-03 | Mapk7   |
| 1422615_at   | 1,85 | 2,2E-03 | Map4k4  |
| 1448050_s_at | 1,78 | 4,2E-03 | Map4k4  |
| 1439323_a_at | 1,92 | 1,4E-03 | Map4k1  |
| 1417115_at   | 1,84 | 2,5E-03 | Map3k12 |
| 1425359_at   | 2,11 | 2,4E-04 | Mall    |

|              |      |         |                                                                                                                |
|--------------|------|---------|----------------------------------------------------------------------------------------------------------------|
| 1423547_at   | 2,13 | 2,0E-04 | Lyz2                                                                                                           |
| 1436996_x_at | 2,41 | 3,4E-06 | Lyz1                                                                                                           |
| 1439426_x_at | 2,17 | 1,2E-04 | Lyz1                                                                                                           |
| 1422903_at   | 1,93 | 2,7E-03 | Ly86                                                                                                           |
| 1416503_at   | 2,07 | 3,8E-04 | Lxn                                                                                                            |
| 1423607_at   | 2,20 | 2,9E-05 | Lum                                                                                                            |
| 1438312_s_at | 2,07 | 4,1E-04 | Ltbp3                                                                                                          |
| 1418061_at   | 2,26 | 3,9E-05 | Ltbp2                                                                                                          |
| 1417756_a_at | 1,97 | 1,4E-03 | Lsp1                                                                                                           |
| 1416053_at   | 1,78 | 5,0E-03 | Lrrn1                                                                                                          |
| 1436714_at   | 1,92 | 6,4E-04 | Lpp                                                                                                            |
| 1455314_at   | 1,89 | 1,5E-03 | Lpp                                                                                                            |
| 1452819_at   | 1,84 | 2,5E-03 | Lphn3                                                                                                          |
| 1424459_at   | 1,80 | 4,3E-03 | Lpcat1                                                                                                         |
| 1448606_at   | 2,19 | 1,2E-04 | Lpar1                                                                                                          |
| 1426110_a_at | 1,97 | 6,2E-04 | Lpar1                                                                                                          |
| 1418269_at   | 2,16 | 3,9E-04 | Loxl3                                                                                                          |
| 1436063_at   | 2,28 | 3,7E-05 | Loxl1                                                                                                          |
| 1451978_at   | 2,11 | 1,3E-04 | Loxl1                                                                                                          |
| 1426221_at   | 1,96 | 1,6E-03 | Loh11cr2a                                                                                                      |
| 1451318_a_at | 2,27 | 1,7E-05 | LOC676654 /// Lyn                                                                                              |
| 1425598_a_at | 1,93 | 1,2E-03 | LOC676654 /// Lyn                                                                                              |
| 1448553_at   | 2,49 | 8,5E-07 | LOC674761 /// Myh7                                                                                             |
| 1445707_at   | 1,94 | 7,7E-04 | LOC639816 /// Zdhhc6                                                                                           |
| 1426260_a_at | 1,97 | 1,1E-03 | LOC632297 /// Ugt1a1 ///<br>Ugt1a10 /// Ugt1a2 /// Ugt1a5 ///<br>Ugt1a6a /// Ugt1a6b /// Ugt1a7c<br>/// Ugt1a9 |
| 1416118_at   | 2,00 | 9,0E-04 | LOC630539 /// Trim59                                                                                           |
| 1439432_x_at | 1,96 | 7,6E-04 | LOC433261 /// LOC674828 ///<br>Morf412                                                                         |
| 1431004_at   | 2,27 | 1,8E-05 | LOC100047339                                                                                                   |
| 1423956_at   | 2,07 | 2,5E-04 | LOC100046746 /// Smap1                                                                                         |
| 1431744_a_at | 1,86 | 2,1E-03 | LOC100046746 /// Smap1                                                                                         |
| 1439253_x_at | 2,14 | 1,0E-04 | LOC100046650 /// Prelid1                                                                                       |
| 1448202_x_at | 2,23 | 4,8E-05 | LOC100046650 /// LOC675389<br>/// Prelid1                                                                      |
| 1426306_a_at | 1,95 | 1,3E-03 | LOC100046560 /// Maged2                                                                                        |
| 1460038_at   | 1,85 | 2,2E-03 | LOC100045707 /// Pou3f1                                                                                        |
| 1448754_at   | 2,17 | 7,6E-05 | LOC100045055 /// Rbp1                                                                                          |
| 1455839_at   | 2,02 | 6,6E-04 | LOC100044322 /// Ugcgl1                                                                                        |
| 1417219_s_at | 2,30 | 3,2E-05 | LOC100043712 ///<br>LOC100047613 /// Tmsb10                                                                    |
| 1436902_x_at | 2,27 | 4,1E-05 | LOC100043712 ///<br>LOC100047613 /// Tmsb10                                                                    |
| 1437185_s_at | 2,32 | 8,2E-06 | LOC100043712 ///<br>LOC100047613 ///<br>LOC100048142 /// Tmsb10                                                |
| 1449323_a_at | 2,23 | 3,5E-05 | LOC100043000 /// Rpl3                                                                                          |
| 1423455_at   | 2,13 | 1,6E-04 | LOC100041948 /// Ptma                                                                                          |
| 1424169_at   | 2,08 | 3,2E-04 | LOC100039683 ///<br>LOC100045937 /// Tax1bp3                                                                   |
| 1455871_s_at | 2,11 | 8,6E-05 | LOC100039683 ///<br>LOC100045937 /// Rpl13 ///<br>Tax1bp3                                                      |
| 1444008_at   | 1,83 | 2,3E-03 | LOC100039284                                                                                                   |
| 1451120_at   | 2,11 | 3,4E-04 | LOC100039220 /// Rpo1-3                                                                                        |
| 1450251_a_at | 1,77 | 4,2E-03 | Lnx1                                                                                                           |
| 1418478_at   | 1,78 | 4,5E-03 | Lmo1                                                                                                           |
| 1457670_s_at | 1,99 | 4,1E-04 | Lmna                                                                                                           |
| 1450629_at   | 1,81 | 4,8E-03 | Lima1                                                                                                          |

|              |      |         |                                                                                                                                             |
|--------------|------|---------|---------------------------------------------------------------------------------------------------------------------------------------------|
| 1420464_s_at | 1,97 | 8,8E-04 | Lilrb3 /// LOC100038909 ///<br>LOC100041146 /// LOC675749<br>/// Pira1 /// Pira11 /// Pira2 ///<br>Pira3 /// Pira4 /// Pira6 /// Pira7      |
| 1419573_a_at | 2,06 | 2,8E-04 | Lgals1                                                                                                                                      |
| 1436900_x_at | 2,09 | 2,3E-04 | Leprot                                                                                                                                      |
| 1415983_at   | 2,07 | 4,6E-04 | Lcp1                                                                                                                                        |
| 1451629_at   | 1,78 | 5,2E-03 | Lbh /// LOC100048380                                                                                                                        |
| 1426025_s_at | 1,86 | 3,7E-03 | Laptm5                                                                                                                                      |
| 1424113_at   | 2,01 | 6,9E-04 | Lamb1-1                                                                                                                                     |
| 1451241_at   | 1,99 | 7,5E-04 | Lamb1-1                                                                                                                                     |
| 1424114_s_at | 1,87 | 2,3E-03 | Lamb1-1                                                                                                                                     |
| 1424807_at   | 2,07 | 4,0E-04 | Lama4                                                                                                                                       |
| 1455543_at   | 1,75 | 6,6E-03 | Klh18                                                                                                                                       |
| 1418280_at   | 1,90 | 2,3E-03 | Klf6                                                                                                                                        |
| 1439695_a_at | 1,90 | 1,4E-03 | Kif20b                                                                                                                                      |
| 1449207_a_at | 2,19 | 3,7E-05 | Kif20a                                                                                                                                      |
| 1417205_at   | 1,99 | 1,3E-03 | Kdelr2                                                                                                                                      |
| 1435525_at   | 1,86 | 2,1E-03 | Kctd17                                                                                                                                      |
| 1429159_at   | 2,23 | 5,5E-05 | ltih5                                                                                                                                       |
| 1441946_at   | 1,87 | 3,0E-03 | ltih5                                                                                                                                       |
| 1425039_at   | 2,23 | 8,2E-05 | ltgb1                                                                                                                                       |
| 1450678_at   | 2,01 | 1,3E-03 | ltgb2                                                                                                                                       |
| 1453898_at   | 2,17 | 8,7E-05 | ltgb1bp3                                                                                                                                    |
| 1460285_at   | 2,02 | 4,5E-04 | ltga9                                                                                                                                       |
| 1422444_at   | 2,14 | 1,3E-04 | ltga6                                                                                                                                       |
| 1422445_at   | 1,83 | 3,6E-03 | ltga6                                                                                                                                       |
| 1455251_at   | 2,02 | 6,3E-04 | ltga1                                                                                                                                       |
| 1418450_at   | 2,07 | 2,5E-04 | lslr                                                                                                                                        |
| 1448452_at   | 1,80 | 5,8E-03 | lrf8                                                                                                                                        |
| 1417380_at   | 1,96 | 8,1E-04 | lqgap1                                                                                                                                      |
| 1417379_at   | 1,87 | 3,1E-03 | lqgap1                                                                                                                                      |
| 1441645_s_at | 2,09 | 2,5E-04 | lpo9                                                                                                                                        |
| 1423274_at   | 1,97 | 1,5E-03 | lnts6                                                                                                                                       |
| 1448686_at   | 2,05 | 2,8E-04 | ll16                                                                                                                                        |
| 1427164_at   | 1,84 | 3,1E-03 | ll13ra1                                                                                                                                     |
| 1454783_at   | 1,77 | 5,8E-03 | ll13ra1                                                                                                                                     |
| 1423584_at   | 2,41 | 4,8E-06 | lgfbp7                                                                                                                                      |
| 1423585_at   | 2,09 | 4,2E-04 | lgfbp7                                                                                                                                      |
| 1452114_s_at | 1,91 | 2,3E-03 | lgfbp5                                                                                                                                      |
| 1423757_x_at | 2,01 | 5,4E-04 | lgfbp4                                                                                                                                      |
| 1434413_at   | 1,96 | 1,1E-03 | lgf1                                                                                                                                        |
| 1427239_at   | 2,15 | 1,7E-04 | lft122                                                                                                                                      |
| 1441259_s_at | 2,15 | 1,2E-04 | lft122                                                                                                                                      |
| 1417460_at   | 2,08 | 1,9E-04 | lfitm2                                                                                                                                      |
| 1418293_at   | 1,98 | 6,6E-04 | lfit2                                                                                                                                       |
| 1421551_s_at | 1,93 | 8,2E-04 | lfi202b                                                                                                                                     |
| 1454898_s_at | 2,34 | 6,5E-06 | lah1                                                                                                                                        |
| 1429119_at   | 2,02 | 4,8E-04 | lah1                                                                                                                                        |
| 1416028_a_at | 2,47 | 9,4E-07 | Hn1                                                                                                                                         |
| 1448180_a_at | 1,84 | 2,9E-03 | Hn1                                                                                                                                         |
| 1428242_at   | 2,00 | 6,3E-04 | Hmha1                                                                                                                                       |
| 1438009_at   | 1,93 | 1,1E-03 | Hist1h2ab /// Hist1h2ac ///<br>Hist1h2ad /// Hist1h2ae ///<br>Hist1h2ag /// Hist1h2ai ///<br>Hist1h2an /// Hist1h2ao /// RP23-<br>480B19.10 |
| 1430062_at   | 1,88 | 2,4E-03 | Hhip1                                                                                                                                       |
| 1435241_at   | 1,90 | 1,2E-03 | Heatr5a                                                                                                                                     |

|              |      |         |                                            |
|--------------|------|---------|--------------------------------------------|
| 1418350_at   | 1,92 | 1,2E-03 | Hbegf                                      |
| 1418349_at   | 1,86 | 2,4E-03 | Hbegf                                      |
| 1448124_at   | 1,92 | 1,4E-03 | Gusb                                       |
| 1448148_at   | 2,26 | 4,6E-05 | Grn                                        |
| 1456567_x_at | 1,91 | 1,3E-03 | Grn                                        |
| 1449514_at   | 2,24 | 4,4E-05 | Grk5                                       |
| 1425458_a_at | 1,86 | 2,7E-03 | Grb10                                      |
| 1460671_at   | 1,95 | 1,1E-03 | Gpx1                                       |
| 1418396_at   | 2,00 | 9,8E-04 | Gpsm3                                      |
| 1426973_at   | 2,08 | 3,2E-04 | Gpr153                                     |
| 1439256_x_at | 2,56 | 6,7E-07 | Gpr137b-ps                                 |
| 1439255_s_at | 1,87 | 2,3E-03 | Gpr137b /// Gpr137b-ps ///<br>LOC100044979 |
| 1418379_s_at | 2,16 | 1,5E-04 | Gpr124                                     |
| 1425942_a_at | 1,92 | 1,1E-03 | Gpm6b                                      |
| 1437417_s_at | 1,96 | 1,0E-03 | Gpc6 /// LOC100045283                      |
| 1428774_at   | 1,93 | 9,8E-04 | Gpc6 /// LOC100045283                      |
| 1419688_at   | 1,93 | 2,1E-03 | Gpc6 /// LOC100045283                      |
| 1452357_at   | 2,31 | 9,7E-06 | Gp1bb /// Sept5                            |
| 1419469_at   | 1,97 | 1,3E-03 | Gnb4                                       |
| 1419470_at   | 1,93 | 9,0E-04 | Gnb4                                       |
| 1421152_a_at | 1,96 | 1,6E-03 | Gnao1                                      |
| 1428645_at   | 1,97 | 1,0E-03 | Gnai3                                      |
| 1419194_s_at | 1,83 | 6,0E-03 | Gmfg                                       |
| 1419027_s_at | 1,87 | 3,1E-03 | Gltf                                       |
| 1416598_at   | 2,09 | 2,0E-04 | Glis2                                      |
| 1418949_at   | 1,92 | 2,1E-03 | Gdf15                                      |
| 1423569_at   | 1,88 | 2,4E-03 | Gatm                                       |
| 1455980_a_at | 2,42 | 1,8E-06 | Gas2l3                                     |
| 1453416_at   | 1,99 | 4,8E-04 | Gas2l3                                     |
| 1437244_at   | 1,89 | 1,9E-03 | Gas2l3                                     |
| 1418533_s_at | 1,89 | 2,4E-03 | Fzd2                                       |
| 1437284_at   | 1,91 | 8,9E-04 | Fzd1                                       |
| 1417343_at   | 2,10 | 2,4E-04 | Fxyd6                                      |
| 1418296_at   | 2,53 | 7,9E-07 | Fxyd5                                      |
| 1416109_at   | 1,80 | 5,3E-03 | Fuca1                                      |
| 1422803_at   | 2,01 | 5,2E-04 | Fstl3                                      |
| 1448259_at   | 2,72 | 7,9E-09 | Fstl1                                      |
| 1416221_at   | 2,71 | 2,6E-09 | Fstl1                                      |
| 1416514_a_at | 1,92 | 1,2E-03 | Fscn1                                      |
| 1416516_at   | 1,78 | 4,3E-03 | Fscn1                                      |
| 1453321_at   | 2,24 | 6,7E-05 | Fndc1                                      |
| 1426642_at   | 2,01 | 1,2E-03 | Fn1                                        |
| 1426825_at   | 1,87 | 2,2E-03 | Fmnl3                                      |
| 1421855_at   | 2,47 | 4,9E-07 | Fgl2                                       |
| 1421854_at   | 2,46 | 4,4E-07 | Fgl2                                       |
| 1433964_s_at | 1,99 | 7,0E-04 | Fermt3                                     |
| 1427155_at   | 1,80 | 4,0E-03 | Fchsd1                                     |
| 1448620_at   | 1,93 | 1,9E-03 | Fcgr3                                      |
| 1435477_s_at | 1,92 | 2,4E-03 | Fcgr2b                                     |
| 1425896_a_at | 2,27 | 2,7E-05 | Fbn1                                       |
| 1460208_at   | 2,14 | 8,9E-05 | Fbn1                                       |
| 1423407_a_at | 2,18 | 5,2E-05 | Fbln2                                      |
| 1437308_s_at | 1,88 | 2,1E-03 | F2r                                        |
| 1448929_at   | 1,77 | 8,2E-03 | F13a1                                      |
| 1435390_at   | 1,88 | 2,4E-03 | Exod1                                      |
| 1452163_at   | 1,77 | 6,6E-03 | Ets1                                       |
| 1433862_at   | 2,03 | 3,8E-04 | Espl1                                      |



|              |      |         |                                |
|--------------|------|---------|--------------------------------|
| 1453634_a_at | 1,73 | 7,7E-03 | Erp29                          |
| 1459546_s_at | 1,94 | 1,3E-03 | Enpp1                          |
| 1426541_a_at | 1,94 | 1,1E-03 | Endod1                         |
| 1421624_a_at | 2,53 | 3,5E-07 | Enah                           |
| 1424801_at   | 2,22 | 3,5E-05 | Enah                           |
| 1424800_at   | 2,09 | 1,5E-04 | Enah                           |
| 1417104_at   | 2,02 | 3,1E-04 | Emp3                           |
| 1416529_at   | 2,66 | 6,2E-08 | Emp1                           |
| 1416414_at   | 1,94 | 2,0E-03 | Emilin1                        |
| 1434976_x_at | 1,84 | 2,4E-03 | Eif4ebp1                       |
| 1417562_at   | 1,80 | 4,5E-03 | Eif4ebp1                       |
| 1448406_at   | 1,85 | 4,2E-03 | Eid1                           |
| 1439056_at   | 1,92 | 1,1E-03 | EG636791                       |
| 1424269_a_at | 2,03 | 3,8E-04 | EG433297 /// EG667952 /// Myl6 |
| 1431339_a_at | 2,10 | 1,5E-04 | Efhd2                          |
| 1437478_s_at | 1,96 | 4,5E-04 | Efhd2                          |
| 1417018_at   | 1,89 | 3,0E-03 | Efemp2                         |
| 1424635_at   | 1,95 | 9,7E-04 | Eef1a1                         |
| 1437347_at   | 2,07 | 1,8E-04 | Ednrb                          |
| 1424065_at   | 1,83 | 3,4E-03 | Edem1                          |
| 1451218_at   | 1,83 | 3,7E-03 | Edem1                          |
| 1448613_at   | 2,30 | 4,3E-05 | Ecm1                           |
| 1433529_at   | 1,95 | 1,7E-03 | E430002G05Rik                  |
| 1436768_x_at | 1,90 | 1,6E-03 | E130112L23Rik                  |
| 1417339_a_at | 1,98 | 2,8E-04 | Dynll1 /// EG627788            |
| 1456125_a_at | 1,94 | 5,0E-04 | Dynll1 /// EG627788            |
| 1424947_at   | 1,88 | 1,8E-03 | Dync1li1                       |
| 1425608_at   | 1,85 | 2,4E-03 | Dusp3                          |
| 1456769_at   | 1,85 | 3,9E-03 | Dusp3                          |
| 1434472_at   | 1,83 | 3,2E-03 | Dusp3                          |
| 1452594_at   | 1,82 | 3,6E-03 | Dusp11                         |
| 1438407_at   | 2,18 | 6,4E-05 | Dsel                           |
| 1415877_at   | 2,18 | 7,1E-05 | Dpysl3                         |
| 1433770_at   | 2,30 | 2,3E-05 | Dpysl2                         |
| 1456533_at   | 2,14 | 8,0E-05 | Dpy19l1                        |
| 1433759_at   | 1,83 | 3,1E-03 | Dpy19l1                        |
| 1436479_a_at | 2,03 | 7,5E-04 | Dpp7                           |
| 1423376_a_at | 2,35 | 1,4E-05 | Dok4                           |
| 1429028_at   | 2,38 | 4,5E-06 | Dock11                         |
| 1460365_a_at | 1,99 | 1,1E-03 | Dnm1                           |
| 1449372_at   | 1,76 | 6,2E-03 | Dnajc3a                        |
| 1417312_at   | 1,89 | 1,8E-03 | Dkk3                           |
| 1435820_x_at | 2,19 | 3,0E-05 | Ddr1                           |
| 1415797_at   | 1,78 | 6,1E-03 | Ddr1                           |
| 1418334_at   | 1,82 | 3,4E-03 | Dbf4                           |
| 1451112_s_at | 2,36 | 6,7E-06 | Dap                            |
| 1423805_at   | 2,02 | 4,6E-04 | Dab2                           |
| 1450959_at   | 2,06 | 4,4E-04 | D930014E17Rik                  |
| 1417953_at   | 1,95 | 1,1E-03 | D6Wsu176e                      |
| 1427181_at   | 1,72 | 5,2E-03 | D18Erttd653e                   |
| 1438868_at   | 1,90 | 1,6E-03 | D14Erttd668e                   |
| 1436736_x_at | 1,87 | 2,8E-03 | D0H4S114                       |
| 1449282_at   | 1,88 | 3,1E-03 | Cysltr1                        |
| 1442340_x_at | 1,81 | 4,0E-03 | Cyr61                          |
| 1435616_at   | 2,06 | 2,5E-04 | Cyp20a1                        |
| 1422186_s_at | 2,15 | 2,4E-04 | Cyb5r3                         |
| 1422185_a_at | 2,02 | 5,9E-04 | Cyb5r3                         |

|              |      |         |                       |
|--------------|------|---------|-----------------------|
| 1448710_at   | 1,96 | 2,1E-03 | Cxcr4                 |
| 1433908_a_at | 2,11 | 2,7E-04 | Ctnn                  |
| 1423917_a_at | 2,01 | 5,7E-04 | Ctnn                  |
| 1417868_a_at | 2,23 | 5,8E-05 | Ctsz                  |
| 1417870_x_at | 2,17 | 1,5E-04 | Ctsz                  |
| 1417869_s_at | 1,85 | 3,5E-03 | Ctsz                  |
| 1448591_at   | 2,11 | 3,9E-04 | Ctss                  |
| 1450652_at   | 2,36 | 1,6E-05 | Ctsk                  |
| 1416953_at   | 2,22 | 3,8E-05 | Ctgf                  |
| 1422510_at   | 1,91 | 2,8E-03 | Ctdspl                |
| 1419873_s_at | 2,23 | 3,9E-05 | Csf1r                 |
| 1419872_at   | 2,13 | 1,8E-04 | Csf1r                 |
| 1418476_at   | 2,00 | 4,2E-04 | Crlf1                 |
| 1416326_at   | 2,04 | 1,7E-04 | Crip1                 |
| 1452381_at   | 2,05 | 4,4E-04 | Creb3l2               |
| 1435281_at   | 1,97 | 1,2E-03 | Cpt1c                 |
| 1417960_at   | 2,11 | 2,8E-04 | Cpeb1                 |
| 1455393_at   | 1,78 | 5,4E-03 | Cp                    |
| 1436838_x_at | 2,26 | 5,1E-05 | Cotl1                 |
| 1436236_x_at | 1,86 | 1,5E-03 | Cotl1                 |
| 1455269_a_at | 1,86 | 3,5E-03 | Coro1a                |
| 1415670_at   | 1,86 | 3,3E-03 | Copg                  |
| 1419693_at   | 2,02 | 5,3E-04 | Colec12               |
| 1418440_at   | 2,77 | 7,2E-08 | Col8a1                |
| 1455627_at   | 2,53 | 7,7E-07 | Col8a1                |
| 1447819_x_at | 2,33 | 1,3E-05 | Col8a1                |
| 1418441_at   | 1,97 | 7,0E-04 | Col8a1                |
| 1424131_at   | 1,91 | 8,7E-04 | Col6a3                |
| 1426947_x_at | 2,12 | 6,6E-05 | Col6a2                |
| 1452250_a_at | 2,04 | 2,4E-04 | Col6a2                |
| 1448590_at   | 1,95 | 8,4E-04 | Col6a1                |
| 1422437_at   | 2,30 | 1,8E-05 | Col5a2                |
| 1450625_at   | 1,94 | 1,1E-03 | Col5a2                |
| 1416740_at   | 2,41 | 5,9E-06 | Col5a1                |
| 1434479_at   | 2,10 | 3,5E-04 | Col5a1                |
| 1416741_at   | 1,86 | 2,4E-03 | Col5a1                |
| 1425476_at   | 1,95 | 1,3E-03 | Col4a5                |
| 1440250_at   | 1,98 | 7,6E-04 | Col4a4                |
| 1445328_at   | 1,80 | 5,0E-03 | Col4a4                |
| 1438779_at   | 2,24 | 4,8E-05 | Col4a3                |
| 1424051_at   | 1,88 | 1,6E-03 | Col4a2                |
| 1426348_at   | 1,88 | 1,6E-03 | Col4a1                |
| 1427883_a_at | 2,31 | 8,5E-06 | Col3a1                |
| 1427884_at   | 1,94 | 1,1E-03 | Col3a1                |
| 1450857_a_at | 2,58 | 3,0E-07 | Col1a2                |
| 1423110_at   | 2,48 | 1,0E-06 | Col1a2                |
| 1423669_at   | 2,51 | 8,4E-07 | Col1a1                |
| 1455494_at   | 2,36 | 3,8E-06 | Col1a1                |
| 1427986_a_at | 2,02 | 6,1E-04 | Col16a1               |
| 1448755_at   | 2,03 | 4,8E-04 | Col15a1               |
| 1428455_at   | 2,36 | 2,4E-05 | Col14a1               |
| 1427168_a_at | 2,12 | 1,4E-04 | Col14a1               |
| 1434411_at   | 1,97 | 1,1E-03 | Col12a1               |
| 1449154_at   | 1,92 | 8,8E-04 | Col11a1               |
| 1456380_x_at | 2,08 | 2,8E-04 | Cnn3 /// LOC100047856 |
| 1438354_x_at | 1,89 | 1,5E-03 | Cnn3                  |
| 1455399_at   | 2,12 | 1,2E-04 | Cnksr1                |

|              |      |         |                                           |
|--------------|------|---------|-------------------------------------------|
| 1454849_x_at | 2,22 | 6,2E-05 | Clu                                       |
| 1437458_x_at | 2,08 | 3,2E-04 | Clu                                       |
| 1456873_at   | 1,97 | 5,1E-04 | Clic5                                     |
| 1439505_at   | 1,93 | 8,4E-04 | Clic5                                     |
| 1416656_at   | 2,01 | 3,3E-04 | Clic1                                     |
| 1419627_s_at | 1,90 | 2,5E-03 | Clec4n                                    |
| 1417458_s_at | 2,71 | 7,3E-08 | Cks2 /// LOC100039474 ///<br>LOC100044764 |
| 1417457_at   | 2,17 | 6,7E-05 | Cks2 /// LOC100039474 ///<br>LOC100044764 |
| 1455019_x_at | 1,96 | 7,4E-04 | Ckap4                                     |
| 1434748_at   | 2,24 | 2,0E-05 | Ckap2                                     |
| 1457296_at   | 2,29 | 1,4E-05 | Cilp                                      |
| 1452242_at   | 1,80 | 5,9E-03 | Cep55                                     |
| 1428727_at   | 1,88 | 3,4E-03 | Cep192                                    |
| 1437154_at   | 2,01 | 3,9E-04 | Cep170                                    |
| 1415704_a_at | 2,23 | 3,4E-05 | Cdv3                                      |
| 1424143_a_at | 1,85 | 2,3E-03 | Cdt1                                      |
| 1448314_at   | 2,13 | 1,5E-04 | Cdc2a                                     |
| 1419589_at   | 1,83 | 3,5E-03 | Cd93                                      |
| 1416066_at   | 2,14 | 2,2E-04 | Cd9                                       |
| 1449164_at   | 2,20 | 1,0E-04 | Cd68                                      |
| 1434376_at   | 2,22 | 5,2E-05 | Cd44                                      |
| 1423760_at   | 1,97 | 7,4E-04 | Cd44                                      |
| 1416072_at   | 2,16 | 5,6E-05 | Cd34                                      |
| 1448919_at   | 1,99 | 8,3E-04 | Cd302                                     |
| 1436346_at   | 1,99 | 3,4E-04 | Cd109                                     |
| 1425658_at   | 1,85 | 3,1E-03 | Cd109                                     |
| 1424727_at   | 1,85 | 2,8E-03 | Ccr5                                      |
| 1430127_a_at | 2,34 | 9,1E-06 | Ccnd2                                     |
| 1416122_at   | 2,33 | 1,0E-05 | Ccnd2                                     |
| 1448229_s_at | 2,17 | 4,7E-05 | Ccnd2                                     |
| 1434745_at   | 2,09 | 1,7E-04 | Ccnd2                                     |
| 1416123_at   | 2,00 | 4,0E-04 | Ccnd2                                     |
| 1455956_x_at | 1,97 | 7,9E-04 | Ccnd2                                     |
| 1417419_at   | 1,96 | 1,1E-03 | Ccnd1                                     |
| 1419943_s_at | 2,10 | 1,6E-04 | Ccnb1                                     |
| 1417910_at   | 2,24 | 2,4E-05 | Ccna2                                     |
| 1437216_at   | 2,20 | 4,6E-05 | Ccdc88a                                   |
| 1436025_at   | 1,90 | 1,3E-03 | Ccdc88a                                   |
| 1424186_at   | 2,12 | 8,2E-05 | Ccdc80                                    |
| 1424187_at   | 1,98 | 4,9E-04 | Ccdc80                                    |
| 1439109_at   | 2,08 | 3,8E-04 | Ccdc68                                    |
| 1422598_at   | 1,78 | 4,6E-03 | Casq1                                     |
| 1449297_at   | 1,97 | 1,4E-03 | Casp12 /// LOC100044205                   |
| 1415976_a_at | 1,87 | 1,8E-03 | Carhsp1 /// LOC100046246                  |
| 1450355_a_at | 2,31 | 3,8E-06 | Capg                                      |
| 1455401_at   | 1,94 | 1,2E-03 | Camkk2                                    |
| 1415870_at   | 1,83 | 3,9E-03 | Calu                                      |
| 1424770_at   | 2,11 | 1,5E-04 | Cald1                                     |
| 1425814_a_at | 2,07 | 7,2E-05 | Calcr1                                    |
| 1455542_at   | 1,83 | 2,8E-03 | C630043F03Rik                             |
| 1417009_at   | 1,88 | 3,3E-03 | C1r                                       |
| 1431856_a_at | 2,14 | 2,6E-04 | C1qtnf6                                   |
| 1449401_at   | 1,87 | 4,3E-03 | C1qc                                      |
| 1434366_x_at | 2,00 | 7,2E-04 | C1qb                                      |
| 1417063_at   | 1,90 | 2,5E-03 | C1qb                                      |
| 1424278_a_at | 2,07 | 2,1E-04 | Birc5                                     |

|              |      |         |                                                       |
|--------------|------|---------|-------------------------------------------------------|
| 1437889_x_at | 2,65 | 7,7E-08 | Bgn                                                   |
| 1448323_a_at | 2,63 | 7,7E-08 | Bgn                                                   |
| 1416405_at   | 2,56 | 5,0E-07 | Bgn                                                   |
| 1448595_a_at | 2,04 | 3,7E-04 | Bex1                                                  |
| 1457687_at   | 2,21 | 3,4E-05 | Bcl2 /// LOC100046608                                 |
| 1437122_at   | 2,17 | 8,1E-05 | Bcl2 /// LOC100046608                                 |
| 1435330_at   | 1,75 | 7,0E-03 | BC094916 /// LOC100048304 ///<br>LOC637605 /// Pyhin1 |
| 1427966_at   | 1,86 | 2,1E-03 | BC087945                                              |
| 1436195_at   | 2,09 | 2,1E-04 | BC046404                                              |
| 1423678_at   | 1,93 | 2,3E-03 | BC017643                                              |
| 1428572_at   | 2,02 | 7,0E-04 | Basp1 /// LOC100045716                                |
| 1423753_at   | 2,15 | 8,4E-05 | Bambi                                                 |
| 1430649_at   | 1,80 | 3,6E-03 | Baalc                                                 |
| 1425128_at   | 1,86 | 2,6E-03 | B3gnt8                                                |
| 1424511_at   | 1,90 | 1,2E-03 | Aurka                                                 |
| 1456179_at   | 1,89 | 1,2E-03 | AU019176                                              |
| 1455396_at   | 1,92 | 1,1E-03 | Atp8b1                                                |
| 1448421_s_at | 2,39 | 1,4E-06 | Aspn                                                  |
| 1416652_at   | 2,29 | 7,9E-06 | Aspn                                                  |
| 1429189_at   | 2,03 | 1,0E-03 | Arsb                                                  |
| 1451987_at   | 2,05 | 2,9E-04 | Arrb2                                                 |
| 1460444_at   | 1,91 | 1,7E-03 | Arrb1                                                 |
| 1448129_at   | 1,88 | 1,8E-03 | Arpc5                                                 |
| 1448279_at   | 2,06 | 4,1E-04 | Arpc3                                                 |
| 1437148_at   | 2,21 | 7,1E-05 | Arpc2                                                 |
| 1416226_at   | 2,42 | 2,7E-06 | Arpc1b                                                |
| 1434409_at   | 1,77 | 5,1E-03 | Armxc6                                                |
| 1456739_x_at | 2,15 | 5,6E-05 | Armxc2                                                |
| 1426534_a_at | 1,86 | 2,7E-03 | Arfgap3 /// LOC100045474                              |
| 1417828_at   | 2,18 | 6,0E-05 | Aqp8                                                  |
| 1452870_at   | 1,83 | 3,5E-03 | Apaf1                                                 |
| 1422593_at   | 2,05 | 6,2E-04 | Ap3s1                                                 |
| 1427077_a_at | 2,00 | 1,2E-03 | Ap2b1                                                 |
| 1416138_at   | 1,96 | 1,2E-03 | Anxa7                                                 |
| 1425567_a_at | 2,37 | 1,5E-05 | Anxa5                                                 |
| 1424176_a_at | 1,91 | 2,4E-03 | Anxa4                                                 |
| 1460330_at   | 1,89 | 2,8E-03 | Anxa3                                                 |
| 1419091_a_at | 2,47 | 1,6E-07 | Anxa2                                                 |
| 1448213_at   | 2,11 | 9,4E-05 | Anxa1                                                 |
| 1451446_at   | 2,38 | 5,3E-06 | Antxr1                                                |
| 1417082_at   | 2,20 | 4,6E-05 | Anp32b                                                |
| 1433543_at   | 1,90 | 1,6E-03 | Anln                                                  |
| 1428183_at   | 2,22 | 3,3E-05 | Ankrd23                                               |
| 1420992_at   | 2,35 | 4,0E-06 | Ankrd1                                                |
| 1420991_at   | 2,34 | 3,9E-06 | Ankrd1                                                |
| 1438941_x_at | 1,89 | 1,9E-03 | Ampd2                                                 |
| 1435260_at   | 1,86 | 3,1E-03 | Akt3                                                  |
| 1418204_s_at | 2,21 | 6,2E-05 | Aif1                                                  |
| 1436520_at   | 2,54 | 3,8E-07 | Ahnak2                                                |
| 1450637_a_at | 2,12 | 8,8E-05 | Aebp1                                                 |
| 1420970_at   | 2,13 | 3,0E-04 | Adcy7                                                 |
| 1456307_s_at | 2,06 | 2,5E-04 | Adcy7                                                 |
| 1450065_at   | 2,05 | 3,7E-04 | Adcy7                                                 |
| 1442093_at   | 1,83 | 2,9E-03 | Adc                                                   |
| 1429214_at   | 2,46 | 2,0E-06 | Adamtsl2                                              |
| 1457058_at   | 2,23 | 8,2E-05 | Adamts2                                               |
| 1435990_at   | 2,17 | 7,9E-05 | Adamts2                                               |

|              |      |         |                             |
|--------------|------|---------|-----------------------------|
| 1452587_at   | 2,18 | 6,8E-05 | Actr2                       |
| 1428585_at   | 1,92 | 1,9E-03 | Actn1                       |
| 1436722_a_at | 1,88 | 1,8E-03 | Actb                        |
| 1427735_a_at | 2,63 | 2,2E-08 | Acta1                       |
| 1428082_at   | 1,89 | 2,3E-03 | Acsi5                       |
| 1427034_at   | 2,01 | 6,6E-04 | Ace                         |
| 1433985_at   | 2,08 | 4,2E-04 | Abi2                        |
| 1440879_at   | 1,93 | 1,5E-03 | Abca9                       |
| 1442115_at   | 1,89 | 1,4E-03 | 9430028L06Rik               |
| 1428535_at   | 1,84 | 2,5E-03 | 9430020K01Rik /// LOC433157 |
| 1426812_a_at | 2,02 | 3,6E-04 | 9130404D14Rik               |
| 1428284_at   | 1,81 | 3,2E-03 | 8430427H17Rik               |
| 1452244_at   | 2,25 | 1,5E-05 | 6330406I15Rik               |
| 1430030_at   | 1,91 | 1,0E-03 | 5330426P16Rik               |
| 1434975_x_at | 1,84 | 2,8E-03 | 4933439C20Rik               |
| 1452092_at   | 1,80 | 3,4E-03 | 4631426J05Rik               |
| 1424327_at   | 1,84 | 3,9E-03 | 3200002M19Rik               |
| 1429700_at   | 1,96 | 1,1E-03 | 3110040M04Rik               |
| 1453646_at   | 1,86 | 1,9E-03 | 3110005L21Rik               |
| 1430675_at   | 1,81 | 3,6E-03 | 2900055J20Rik               |
| 1435315_s_at | 1,95 | 1,2E-03 | 2900034E22Rik               |
| 1423266_at   | 2,10 | 1,5E-04 | 2810405K02Rik               |
| 1444678_at   | 1,94 | 4,3E-04 | 2810403D21Rik               |
| 1436673_at   | 1,78 | 5,2E-03 | 2610020H08Rik               |
| 1456310_a_at | 2,00 | 8,1E-04 | 2610002J02Rik               |
| 1418719_at   | 2,07 | 2,3E-04 | 2410004L22Rik               |
| 1428671_at   | 2,04 | 3,1E-04 | 2200002D01Rik               |
| 1452840_at   | 2,27 | 1,6E-05 | 1500009L16Rik               |
| 1424524_at   | 1,97 | 9,6E-04 | 1200002N14Rik               |
| 1435987_x_at | 2,04 | 6,5E-04 | 1110059G02Rik               |
| 1416805_at   | 2,10 | 1,0E-04 | 1110032E23Rik               |
| 1419376_at   | 1,95 | 6,1E-04 | 1110018M03Rik               |
| 1454613_at   | 2,61 | 9,2E-08 | ---                         |
| 1455679_at   | 2,32 | 1,5E-05 | ---                         |
| 1437811_x_at | 2,20 | 1,5E-04 | ---                         |
| 1419829_a_at | 2,04 | 2,4E-04 | ---                         |
| 1455697_at   | 1,96 | 9,3E-04 | ---                         |
| 1439191_at   | 1,95 | 1,4E-03 | ---                         |
| 1459566_at   | 1,83 | 2,5E-03 | ---                         |
| 1457119_at   | 1,83 | 2,1E-03 | ---                         |
| 1456778_at   | 1,79 | 5,7E-03 | ---                         |
| 1446948_at   | 1,78 | 4,1E-03 | ---                         |
| 1429234_s_at | 2,09 | 3,6E-04 | 11-sep                      |
| 1426802_at   | 1,84 | 3,3E-03 | 08-sep                      |
| 1423472_at   | 1,98 | 6,9E-04 | 02-sep                      |
